# Supplementary material for: Klebsiella phages representing a novel clade of viruses with an unknown DNA modification and biotechnologically interesting enzymes
Source: PubMed Central journal article supplement (PMC5219037; doi:10.1007/s00253-016-7928-3), 2016-10-21
Supplement: 253_2016_7928_MOESM1_ESM.pdf [file 253_2016_7928_MOESM1_ESM.pdf]

## **Applied Microbiology and Biotechnology**

### ***Klebsiella* phages representing a novel clade of viruses with an unknown DNA modification and biotechnologically interesting enzymes**

Barbara Maciejewska<sup>1</sup>, Bartosz Roszniowski<sup>1</sup>, Akbar Espailat<sup>2</sup>, Agata Kęsik-Szeloch<sup>1</sup>, Grazyna Majkowska-Skrobek<sup>1</sup>, Andrew M. Kropinski<sup>3</sup>, Yves Briers<sup>4</sup>, Felipe Cava<sup>2</sup>, Rob Lavigne<sup>5</sup>, and Zuzanna Drulis-Kawa<sup>1\*</sup>

<sup>1</sup>Institute of Genetics and Microbiology, University of Wrocław, Przybyszewskiego 63/77, 51-148 Wrocław, Poland

<sup>2</sup>Laboratory for Molecular Infection Medicine Sweden. Molecular Biology Department, Umeå University, SE-901 87 Umeå, Sweden

<sup>3</sup>Departments of Food Science, Molecular and Cellular Biology, and Pathobiology, University of Guelph, 50 Stone Road East, Guelph, ON, N1G 2W1, Canada

<sup>4</sup>Department Applied Biosciences, Ghent University, Valentin Vaerwyckweg 1, 9000 Gent, Belgium

<sup>5</sup>Laboratory of Gene Technology, KULeuven, Leuven Kasteelpark Arenberg 21 box 2462, 3001 Leuven, Belgium

\*Corresponding author. Mailing address:

Zuzanna Drulis-Kawa

Institute of Genetics and Microbiology, University of Wrocław,  
S. Przybyszewskiego 63/77, 51-148 Wrocław, Poland

Tel.: +48 71 375 62 90; Fax: +48 71 325 21 51

E-mail: [zuzanna.drulis-kawa@uwr.edu.pl](mailto:zuzanna.drulis-kawa@uwr.edu.pl)

**Table S1a** Annotation of KP15 genome

| Locus tag     | ORF position | Length of product (aa) | Percent identity with homologous proteins from other phages                                                                                                               | Predicted molecular function           | Characteristic domains                                                                  |
|---------------|--------------|------------------------|---------------------------------------------------------------------------------------------------------------------------------------------------------------------------|----------------------------------------|-----------------------------------------------------------------------------------------|
| KP-KP15_gp001 | 1–900        | 299                    | 100 ( <i>Klebsiella</i> phage Matisse, <i>Klebsiella</i> phage Miro, <i>Escherichia</i> phage phT4A)                                                                      | host membrane ATPase affecting protein | –                                                                                       |
| KP-KP15_gp002 | 900–3161     | 753                    | 100 ( <i>Klebsiella</i> phage Miro)                                                                                                                                       | RIIA-RIIB membrane-associated protein  | pfam13589: HATPase_c_3 (Histidine kinase-, DNA gyrase B-, and HSP90-like ATPase) family |
| KP-KP15_gp004 | 4038–5324    | 428                    | 100 ( <i>Klebsiella</i> phage Miro)                                                                                                                                       | DNA topoisomerase II medium subunit    | pfam00521: DNA_topoisoIV (DNA gyrase/topoisomerase IV, subunit A) family                |
| KP-KP15_gp005 | 5324–7222    | 632                    | 100 ( <i>Klebsiella</i> phage Matisse)                                                                                                                                    | DNA topoisomerase II large subunit     | pfam00204: DNA_gyraseB (DNA gyrase B) family                                            |
| KP-KP15_gp017 | 11457–12128  | 223                    | 100 ( <i>Klebsiella</i> phage KP27, <i>Klebsiella</i> phage Matisse, <i>Enterobacter</i> phage $\phi$ Eap-3, <i>Escherichia</i> phage phT4A)                              | DexA exonuclease A                     | PHA02570: dexA (exonuclease)                                                            |
| KP-KP15_gp020 | 12743–14071  | 442                    | 99 ( <i>Klebsiella</i> phage KP27, <i>Klebsiella</i> phage Matisse, <i>Klebsiella</i> phage Miro, <i>Enterobacter</i> phage $\phi$ Eap-3, <i>Escherichia</i> phage phT4A) | Dda DNA helicase                       | pfam13604: AAA_30 (AAA domain) family                                                   |
| KP-KP15_gp022 | 14540–15076  | 178                    | 100 ( <i>Klebsiella</i> phage KP27, <i>Klebsiella</i> phage Miro, <i>Enterobacter</i> phage $\phi$ Eap-3)                                                                 | dCTP pyrophosphatase                   | PHA02602: 56 (dCTP pyrophosphatase)                                                     |
| KP-KP15_gp023 | 15084–16109  | 341                    | 99 ( <i>Enterobacter</i> phage $\phi$ Eap-3)                                                                                                                              | DNA primase subunit                    | pfam08275: Toprim_N (DNA primase catalytic core, N-terminal domain) family              |
| KP-KP15_gp026 | 16644–17132  | 162                    | 100 ( <i>Klebsiella</i> phage KP27, <i>Escherichia</i> phage phT4A)                                                                                                       | gp61.1 hypothetical protein            | pfam07068: Gp23 (Major capsid protein Gp23) family                                      |

|               |             |     |                                                                                                                                                                      |                                                 |                                                                                                                                       |
|---------------|-------------|-----|----------------------------------------------------------------------------------------------------------------------------------------------------------------------|-------------------------------------------------|---------------------------------------------------------------------------------------------------------------------------------------|
| KP-KP15_gp032 | 19211–20647 | 478 | 100 ( <i>Escherichia</i> phage phT4A)                                                                                                                                | gp41 replication and recombination DNA helicase | pfam03796: DnaB_C (DnaB-like helicase C terminal domain) family                                                                       |
| KP-KP15_gp033 | 20657–20977 | 106 | 100 ( <i>Klebsiella</i> phage KP27, <i>Klebsiella</i> phage Matisse, <i>Klebsiella</i> phage Miro, <i>Enterobacter</i> phage φEap-3, <i>Escherichia</i> phage phT4A) | membrane-associated initiation of head vertex   | pfam11113: Phage_head_chap (Head assembly gene product) family                                                                        |
| KP-KP15_gp034 | 21015–22172 | 385 | 100 ( <i>Klebsiella</i> phage Miro, <i>Escherichia</i> phage phT4A)                                                                                                  | UvsX RecA-like recombination protein            | pfam00154: RecA (recA bacterial DNA recombination protein) family                                                                     |
| KP-KP15_gp035 | 22247–24946 | 899 | 99 ( <i>Enterobacter</i> phage φEap-3)                                                                                                                               | DNA polymerase                                  | pfam03104: DNA_pol_B_exo1 (DNA polymerase family B, exonuclease domain) family; pfam00136: DNA_pol_B (DNA polymerase family B) family |
| KP-KP15_gp038 | 25675–26037 | 120 | 100 ( <i>Klebsiella</i> phage Matisse)                                                                                                                               | RegA translational repressor of early genes     | pfam01818: Translat_reg (Bacteriophage translational regulator) family                                                                |
| KP-KP15_gp039 | 26041–26604 | 187 | 99 ( <i>Escherichia</i> phage phT4A)                                                                                                                                 | gp62 clamp-loader subunit                       | PHA02593: 62 (clamp loader small subunit)                                                                                             |
| KP-KP15_gp040 | 26607–27605 | 332 | 100 ( <i>Klebsiella</i> phage KP27, <i>Klebsiella</i> phage Matisse, <i>Klebsiella</i> phage Miro, <i>Enterobacter</i> phage φEap-3, <i>Escherichia</i> phage phT4A) | gp44 clamp-loader subunit                       | pfam00004: AAA (ATPase family associated with various cellular activities) family                                                     |
| KP-KP15_gp041 | 27664–28329 | 221 | 100 ( <i>Klebsiella</i> phage KP27, <i>Klebsiella</i> phage Matisse, <i>Klebsiella</i> phage Miro, <i>Enterobacter</i> phage φEap-3, <i>Escherichia</i> phage phT4A) | gp45 sliding clamp DNA polymerase               | pfam02916: DNA_PPF (DNA polymerase processivity factor) family; pfam09116: gp45-slide_C (gp45 sliding clamp, C terminal) family       |
| KP-KP15_gp042 | 28356–28625 | 89  | 100 ( <i>Klebsiella</i> phage KP27, <i>Klebsiella</i> phage Matisse, <i>Klebsiella</i> phage Miro, <i>Enterobacter</i> phage φEap-3, <i>Escherichia</i> phage phT4A) | RpbA RNA polymerase binding protein             | pfam10789: Phage_RpbA (Phage RNA polymerase binding, RpbA) family                                                                     |
| KP-KP15_gp043 | 28681–29652 | 323 | 99 ( <i>Escherichia</i> phage phT4A, <i>Enterobacter</i> phage φEap-3)                                                                                               | gp32 ssDNA binding protein                      | pfam08804: gp32 (gp32 DNA binding protein like) family                                                                                |

|               |             |     |                                                                                                                                                                            |                                         |                                                                                                                                                       |
|---------------|-------------|-----|----------------------------------------------------------------------------------------------------------------------------------------------------------------------------|-----------------------------------------|-------------------------------------------------------------------------------------------------------------------------------------------------------|
| KP-KP15_gp044 | 29668–30246 | 192 | 100 ( <i>Klebsiella</i> phage KP27, <i>Escherichia</i> phage phT4A, <i>Klebsiella</i> phage Matisse, <i>Klebsiella</i> phage Miro, <i>Enterobacter</i> phage $\phi$ Eap-3) | gp59 loader of gene 41 DNA helicase     | pfam08993: T4_Gp59_N (T4 gene Gp59 loader of gp41 DNA helicase) family; pfam08994: T4_Gp59_C (T4 gene Gp59 loader of gp41 DNA helicase C-term) family |
| KP-KP15_gp045 | 30324–30569 | 81  | 100 ( <i>Klebsiella</i> phage KP27, <i>Klebsiella</i> phage Matisse, <i>Klebsiella</i> phage Miro, <i>Enterobacter</i> phage $\phi$ Eap-3, <i>Escherichia</i> phage phT4A) | gp33 late promoter transcription        | pfam16805: Trans_coact (Phage late-transcription coactivator) family                                                                                  |
| KP-KP15_gp046 | 30573–30836 | 87  | 100 ( <i>Klebsiella</i> phage KP27, <i>Klebsiella</i> phage Matisse, <i>Klebsiella</i> phage Miro, <i>Escherichia</i> phage phT4A)                                         | DsbA dsDNA binding                      | pfam11126: Phage_DsbA (Transcriptional regulator DsbA) family                                                                                         |
| KP-KP15_gp047 | 30846–31781 | 311 | 100 ( <i>Klebsiella</i> phage KP27, <i>Klebsiella</i> phage Matisse, <i>Klebsiella</i> phage Miro, <i>Enterobacter</i> phage $\phi$ Eap-3, <i>Escherichia</i> phage phT4A) | RnaseH                                  | pfam02739: 5_3_exonuc_N (5'-3' exonuclease, N-terminal resolvase-like domain) family; pfam09293: RNaseH_C (T4 RNase H, C terminal) family             |
| KP-KP15_gp048 | 32086–32613 | 175 | 100 ( <i>Klebsiella</i> phage KP27, <i>Klebsiella</i> phage Matisse, <i>Klebsiella</i> phage Miro, <i>Enterobacter</i> phage $\phi$ Eap-3)                                 | gp55 RNA polymerase sigma factor        | PHA02547: 55 (RNA polymerase sigma factor)                                                                                                            |
| KP-KP15_gp051 | 33181–34227 | 348 | 99 ( <i>Escherichia</i> phage phT4A)                                                                                                                                       | gp47 recombination endonuclease subunit | PHA02546: 47 (endonuclease subunit)                                                                                                                   |
| KP-KP15_gp053 | 34485–36182 | 565 | 99 ( <i>Klebsiella</i> phage KP27, <i>Klebsiella</i> phage Miro)                                                                                                           | gp46 recombination endonuclease subunit | pfam13476: AAA_23 (AAA domain) family; pfam13555: AAA_29 (P-loop containing region of AAA domain) family                                              |
| KP-KP15_gp059 | 38984–39562 | 192 | 99 ( <i>Klebsiella</i> phage KP27)                                                                                                                                         | Frd dihydrofolate reductase             | pfam00186: DHFR_1 (Dihydrofolate reductase) family                                                                                                    |
| KP-KP15_gp060 | 39564–40439 | 291 | 100 ( <i>Klebsiella</i> phage KP27, <i>Klebsiella</i> phage Matisse, <i>Klebsiella</i> phage Miro)                                                                         | Td thymidylate synthetase               | pfam00303: Thymidylat_synt (Thymidylate synthase) family                                                                                              |
| KP-KP15_gp061 | 40479–42731 | 750 | 100 ( <i>Klebsiella</i> phage Matisse, <i>Klebsiella</i> phage Miro, <i>Enterobacter</i> phage $\phi$ Eap-3)                                                               | NrdA ribonucleotide reductase A subunit | pfam02867: Ribonuc_red_IgC (Ribonucleotide reductase, barrel domain) family                                                                           |

|               |             |     |                                                                                                                                            |                                                  |                                                                                                |
|---------------|-------------|-----|--------------------------------------------------------------------------------------------------------------------------------------------|--------------------------------------------------|------------------------------------------------------------------------------------------------|
| KP-KP15_gp062 | 42735–43943 | 402 | 99 ( <i>Enterobacter</i> phage $\phi$ Eap-3)                                                                                               | NrdB ribonucleotide reductase B subunit          | pfam00268: Ribonuc_red_sm (Ribonucleotide reductase, small chain) family                       |
| KP-KP15_gp064 | 44239–44604 | 121 | 100 ( <i>Klebsiella</i> phage KP27, <i>Klebsiella</i> phage Matisse, <i>Klebsiella</i> phage Miro, <i>Enterobacter</i> phage $\phi$ Eap-3) | DenA endonuclease II                             | PHA02598: denA (endonuclease II)                                                               |
| KP-KP15_gp065 | 44585–45742 | 385 | 99 ( <i>Klebsiella</i> phage KP27, <i>Klebsiella</i> phage Matisse)                                                                        | RnlA RNA ligase 1                                | pfam09511: RNA_lig_T4_1 (RNA ligase) family                                                    |
| KP-KP15_gp066 | 45739–46062 | 107 | 100 ( <i>Klebsiella</i> phage KP27, <i>Enterobacter</i> phage $\phi$ Eap-3)                                                                | PseT.3                                           | PRK05846: PRK05846 (NADH:ubiquinone oxidoreductase subunit M)                                  |
| KP-KP15_gp067 | 46059–46373 | 104 | 100 ( <i>Klebsiella</i> phage KP27)                                                                                                        | PseT.2                                           | –                                                                                              |
| KP-KP15_gp068 | 46528–47412 | 294 | 99 ( <i>Klebsiella</i> phage Matisse, <i>Enterobacter</i> phage $\phi$ Eap-3)                                                              | PseT 3' phosphatase and 5' polynucleotide kinase | pfam13207: AAA_17 (AAA domain) family;<br>pfam13671: AAA_33 (AAA domain) family                |
| KP-KP15_gp072 | 48216–48773 | 185 | 100 ( <i>Escherichia</i> phage phT4A)                                                                                                      | Cd dCMP deaminase                                | pfam00383: dCMP_cyt_deam_1 (Cytidine and deoxycytidylate deaminase zinc-binding region) family |
| KP-KP15_gp073 | 48777–49130 | 117 | 100 ( <i>Klebsiella</i> phage Matisse)                                                                                                     | gp31 co-chaperonin for GroEL                     | pfam00166: Cpn10 (Chaperonin 10 Kd subunit) family                                             |
| KP-KP15_gp078 | 51041–51403 | 120 | 100 ( <i>Escherichia</i> phage phT4A)                                                                                                      | Vs.6                                             | pfam01228: Gly_radical (Glycine radical) family                                                |
| KP-KP15_gp079 | 51403–51672 | 89  | 99 ( <i>Klebsiella</i> phage KP27, <i>Klebsiella</i> phage Matisse, <i>Klebsiella</i> phage Miro, <i>Escherichia</i> phage phT4A)          | Vs.4 hypothetical protein                        | pfam09349: OHCU_decarbox (OHCU decarboxylase) family                                           |
| KP-KP15_gp088 | 54307–55836 | 509 | 100 ( <i>Klebsiella</i> phage KP27, <i>Enterobacter</i> phage $\phi$ Eap-3, <i>Escherichia</i> phage phT4A)                                | gp30 DNA ligase                                  | PHA00454: PHA00454 (ATP-dependent DNA ligase)                                                  |
| KP-KP15_gp094 | 57930–59039 | 369 | 100 ( <i>Klebsiella</i> phage Matisse)                                                                                                     | gp27 baseplate hub subunit                       | pfam09097: Phage-tail_1 (Baseplate structural protein, domain 1) family                        |

|               |             |     |                                                                                                                                                                           |                                     |                                                                                                                                 |
|---------------|-------------|-----|---------------------------------------------------------------------------------------------------------------------------------------------------------------------------|-------------------------------------|---------------------------------------------------------------------------------------------------------------------------------|
| KP-KP15_gp095 | 59082–59684 | 200 | 100 ( <i>Klebsiella</i> phage KP27, <i>Klebsiella</i> phage Matisse, <i>Klebsiella</i> phage Miro, <i>Escherichia</i> phage phT4A)                                        | baseplate distal hub subunit        | pfam11110: Phage_hub_GP28 (Baseplate hub distal subunit) family                                                                 |
| KP-KP15_gp097 | 61473–62546 | 357 | 100 ( <i>Klebsiella</i> phage KP27)                                                                                                                                       | gp48 baseplate subunit              | pfam11091: T4_tail_cap (Tail-tube assembly protein) family                                                                      |
| KP-KP15_gp098 | 62553–63419 | 288 | 100 ( <i>Klebsiella</i> phage Matisse, <i>Enterobacter</i> phage $\phi$ Eap-3, <i>Escherichia</i> phage phT4A)                                                            | gp54 baseplate subunit              | PHA02605: 54 (baseplate subunit)                                                                                                |
| KP-KP15_gp099 | 63448–64191 | 247 | 100 ( <i>Klebsiella</i> phage KP27, <i>Klebsiella</i> phage Matisse, <i>Klebsiella</i> phage Miro, <i>Escherichia</i> phage phT4A)                                        | gp51 baseplate hub assembly protein | pfam12322: T4_baseplate (T4 bacteriophage base plate protein) family                                                            |
| KP-KP15_gp100 | 64188–64742 | 184 | 100 ( <i>Klebsiella</i> phage Matisse)                                                                                                                                    | baseplate hub subunit               | pfam12322: T4_baseplate (T4 bacteriophage base plate protein) family                                                            |
| KP-KP15_gp101 | 64743–65135 | 130 | 100 ( <i>Klebsiella</i> phage KP27, <i>Klebsiella</i> phage Matisse, <i>Klebsiella</i> phage Miro, <i>Escherichia</i> phage phT4A)                                        | baseplate wedge subunit             | pfam04965: GPW_gp25 (Gene 25-like lysozyme) family                                                                              |
| KP-KP15_gp126 | 78617–78919 | 100 | 98 ( <i>Enterobacter</i> phage $\phi$ Eap-3)                                                                                                                              | RI membrane protein                 | PHA02054: PHA02054 (hypothetical protein)                                                                                       |
| KP-KP15_gp128 | 79414–80022 | 202 | 99 ( <i>Klebsiella</i> phage KP27)                                                                                                                                        | Tk thymidine kinase                 | pfam00265: TK (Thymidine kinase) family                                                                                         |
| KP-KP15_gp130 | 80495–80968 | 157 | 99 ( <i>Klebsiella</i> phage KP27, <i>Klebsiella</i> phage Matisse, <i>Klebsiella</i> phage Miro, <i>Enterobacter</i> phage $\phi$ Eap-3, <i>Escherichia</i> phage phT4A) | Tk.4                                | pfam01661: Macro (Macro domain) family                                                                                          |
| KP-KP15_gp136 | 82957–83598 | 213 | 100 ( <i>Klebsiella</i> phage Matisse, <i>Klebsiella</i> phage Miro)                                                                                                      | Vs.1                                | pfam01464: SLT (Transglycosylase SLT domain) family; pfam10715: REGB_T4 (Endoribonuclease RegB T4-bacteriophage encoded) family |
| KP-KP15_gp140 | 85820–86344 | 174 | 100 ( <i>Klebsiella</i> phage Matisse)                                                                                                                                    | RB16 HNH(AP2) 1                     | pfam00847: AP2 (AP2 domain) family                                                                                              |

|               |               |      |                                                                                                                                                                            |                                                   |                                                                                                        |
|---------------|---------------|------|----------------------------------------------------------------------------------------------------------------------------------------------------------------------------|---------------------------------------------------|--------------------------------------------------------------------------------------------------------|
| KP-KP15_gp166 | 97116–97523   | 135  | 100 ( <i>Klebsiella</i> phage KP27, <i>Klebsiella</i> phage Matisse, <i>Klebsiella</i> phage Miro)                                                                         | NudE nudix hydrolase                              | pfam00293: NUDIX (NUDIX domain) family                                                                 |
| KP-KP15_gp172 | 100305–100565 | 86   | 100 ( <i>Klebsiella</i> phage Matisse)                                                                                                                                     | gp57A chaperone for tail fiber formation          | –                                                                                                      |
| KP-KP15_gp173 | 100580–101269 | 229  | 99 ( <i>Klebsiella</i> phage Matisse, <i>Klebsiella</i> phage Miro)                                                                                                        | deoxynucleoside monophosphate kinase              | PHA02575: 1 (deoxynucleoside monophosphate kinase)                                                     |
| KP-KP15_gp174 | 101269–101799 | 176  | 100 ( <i>Klebsiella</i> phage KP27, <i>Klebsiella</i> phage Matisse, <i>Klebsiella</i> phage Miro, <i>Escherichia</i> phage phT4A)                                         | gp3 tail completion and sheath stabilizer protein | PHA02576: 3 (tail completion and sheath stabilizer protein)                                            |
| KP-KP15_gp176 | 102994–103848 | 284  | 99 ( <i>Klebsiella</i> phage KP27, <i>Enterobacter</i> phage $\phi$ Eap-3, <i>Escherichia</i> phage phT4A)                                                                 | gp2 DNA end protector protein                     | PHA02577: 2 (DNA end protector protein)                                                                |
| KP-KP15_gp177 | 103864–104331 | 155  | 100 ( <i>Klebsiella</i> phage KP27, <i>Klebsiella</i> phage Matisse, <i>Klebsiella</i> phage Miro, <i>Enterobacter</i> phage $\phi$ Eap-3, <i>Escherichia</i> phage phT4A) | gp4 head completion protein                       | PHA02552: 4 (head completion protein)                                                                  |
| KP-KP15_gp178 | 104577–104936 | 119  | 99 ( <i>Klebsiella</i> phage KP27, <i>Klebsiella</i> phage Matisse, <i>Klebsiella</i> phage Miro, <i>Escherichia</i> phage phT4A)                                          | gp53 baseplate wedge subunit                      | pfam11246: Phage_gp53 (Base plate wedge protein 53) family                                             |
| KP-KP15_gp179 | 104933–106702 | 589  | 99 ( <i>Klebsiella</i> phage KP27, <i>Klebsiella</i> phage Miro)                                                                                                           | gp5 baseplate hub subunit and tail lysozyme       | pfam06714: Gp5_OB (Gp5 N-terminal OB domain) family; pfam00959: Phage_lysozyme (Phage lysozyme) family |
| KP-KP15_gp181 | 108805–110730 | 641  | 99 ( <i>Klebsiella</i> phage Miro)                                                                                                                                         | gp6 baseplate wedge subunit                       | PHA02553: 6 (baseplate wedge subunit)                                                                  |
| KP-KP15_gp182 | 110811–113897 | 1028 | 99 ( <i>Klebsiella</i> phage Miro)                                                                                                                                         | gp7 baseplate wedge subunit                       | PHA02579: 7 (baseplate wedge subunit)                                                                  |
| KP-KP15_gp183 | 113898–114890 | 330  | 99 ( <i>Klebsiella</i> phage Matisse, <i>Klebsiella</i> phage Miro, <i>Enterobacter</i> phage $\phi$ Eap-3, <i>Escherichia</i> phage phT4A)                                | gp8 baseplate wedge subunit                       | pfam09215: Phage-Gp8 (Bacteriophage T4, Gp8) family                                                    |

|               |               |     |                                                                                                                                              |                                                    |                                                                        |
|---------------|---------------|-----|----------------------------------------------------------------------------------------------------------------------------------------------|----------------------------------------------------|------------------------------------------------------------------------|
| KP-KP15_gp184 | 114900–115763 | 287 | 100 ( <i>Klebsiella</i> phage Matisse, <i>Klebsiella</i> phage Miro)                                                                         | gp9 baseplate wedge tail fiber connector           | pfam07880: T4_gp9_10 (Bacteriophage T4 gp9/10-like protein) family     |
| KP-KP15_gp185 | 115760–117577 | 605 | 99 ( <i>Klebsiella</i> phage KP27)                                                                                                           | gp10 baseplate wedge subunit and tail pin          | pfam07880: T4_gp9_10 (Bacteriophage T4 gp9/10-like protein) family     |
| KP-KP15_gp186 | 117577–118245 | 222 | 100 ( <i>Escherichia</i> phage phT4A)                                                                                                        | gp11 baseplate wedge subunit and tail pin          | pfam08677: GP11 (GP11 baseplate wedge protein) family                  |
| KP-KP15_gp187 | 118255–119640 | 461 | 100 ( <i>Klebsiella</i> phage KP27)                                                                                                          | gp12 short tail fibers                             | pfam07484: Collar (Phage Tail Collar Domain) family                    |
| KP-KP15_gp188 | 119654–121405 | 583 | 99 ( <i>Klebsiella</i> phage Miro)                                                                                                           | whisker protein                                    | pfam07921: Fibrinin_C (Fibrinin C-terminal region) family              |
| KP-KP15_gp189 | 121444–122370 | 308 | 100 ( <i>Klebsiella</i> phage KP27, <i>Klebsiella</i> phage Matisse, <i>Klebsiella</i> phage Miro)                                           | gp13 neck protein                                  | PHA02554: 13 (neck protein)                                            |
| KP-KP15_gp190 | 122380–123126 | 248 | 100 ( <i>Klebsiella</i> phage KP27, <i>Klebsiella</i> phage Matisse, <i>Klebsiella</i> phage Miro, <i>Enterobacter</i> phage $\phi$ Eap-3)   | gp14 neck protein                                  | pfam11649: T4_neck-protein (Virus neck protein) family                 |
| KP-KP15_gp191 | 123207–124031 | 274 | 100 ( <i>Escherichia</i> phage phT4A)                                                                                                        | gp15 tail sheath stabilizer and completion protein | PHA02556: 15 (tail sheath stabilizer and completion protein)           |
| KP-KP15_gp192 | 124031–124570 | 179 | 100 ( <i>Klebsiella</i> phage KP27, <i>Klebsiella</i> phage Matisse, <i>Enterobacter</i> phage $\phi$ Eap-3, <i>Escherichia</i> phage phT4A) | gp16 small terminase protein                       | pfam11053: DNA_Packaging (Terminase DNA packaging enzyme) family       |
| KP-KP15_gp193 | 124539–126368 | 609 | 100 ( <i>Klebsiella</i> phage KP27)                                                                                                          | gp17 large terminase protein                       | pfam03237: Terminase_6 (Terminase-like) family                         |
| KP-KP15_gp194 | 126388–128379 | 663 | 100 ( <i>Klebsiella</i> phage Matisse)                                                                                                       | gp18 tail sheath protein                           | pfam04984: Phage_sheath_1 (Phage tail sheath protein) family           |
| KP-KP15_gp195 | 128428–128913 | 161 | 100 ( <i>Klebsiella</i> phage KP27, <i>Klebsiella</i> phage Matisse, <i>Klebsiella</i> phage Miro)                                           | gp19 tail tube protein                             | pfam06841: Phage_T4_gp19 (T4-like virus tail tube protein gp19) family |



|               |               |     |                                                                                                                                                                            |                                                    |                                                                                       |
|---------------|---------------|-----|----------------------------------------------------------------------------------------------------------------------------------------------------------------------------|----------------------------------------------------|---------------------------------------------------------------------------------------|
|               |               |     | <i>Enterobacter</i> phage $\phi$ Eap-3,<br><i>Escherichia</i> phage phT4A)                                                                                                 |                                                    |                                                                                       |
| KP-KP15_gp196 | 128969–130543 | 524 | 100 ( <i>Klebsiella</i> phage KP27, <i>Klebsiella</i> phage Matisse, <i>Klebsiella</i> phage Miro, <i>Enterobacter</i> phage $\phi$ Eap-3, <i>Escherichia</i> phage phT4A) | gp20 portal vertex protein                         | pfam07230: Phage_T4_Gp20 (Bacteriophage T4-like capsid assembly protein, Gp20) family |
| KP-KP15_gp197 | 130543–130785 | 80  | 100 ( <i>Klebsiella</i> phage KP27, <i>Klebsiella</i> phage Miro, <i>Enterobacter</i> phage $\phi$ Eap-3)                                                                  | gp67 prohead core protein                          | PHA02608: 67 (prohead core protein)                                                   |
| KP-KP15_gp198 | 130794–131198 | 134 | 100 ( <i>Klebsiella</i> phage KP27, <i>Klebsiella</i> phage Matisse, <i>Enterobacter</i> phage $\phi$ Eap-3, <i>Escherichia</i> phage phT4A)                               | gp68 prohead core protein                          | PHA02586: 68 (prohead core protein)                                                   |
| KP-KP15_gp199 | 131201–131848 | 215 | 99 ( <i>Klebsiella</i> phage Matisse, <i>Enterobacter</i> phage $\phi$ Eap-3, <i>Escherichia</i> phage phT4A)                                                              | gp21 prohead core scaffolding protein and protease | pfam03420: Peptidase_S77 (Prohead core protein serine protease) family                |
| KP-KP15_gp200 | 131881–132669 | 262 | 100 ( <i>Klebsiella</i> phage KP27, <i>Klebsiella</i> phage Matisse, <i>Enterobacter</i> phage $\phi$ Eap-3, <i>Escherichia</i> phage phT4A)                               | gp22 prohead core protein                          | PHA02557: 22 (prohead core protein)                                                   |
| KP-KP15_gp201 | 132689–134257 | 522 | 100 ( <i>Klebsiella</i> phage KP27, <i>Klebsiella</i> phage Matisse)                                                                                                       | gp23 major capsid protein                          | pfam07068: Gp23 (Major capsid protein Gp23) family                                    |
| KP-KP15_gp202 | 134343–134978 | 211 | 99 ( <i>Escherichia</i> phage phT4A)                                                                                                                                       | SegD homing endonuclease                           | pfam01541: GIY-YIG (GIY-YIG catalytic domain) family                                  |
| KP-KP15_gp203 | 135011–136300 | 429 | 99 ( <i>Klebsiella</i> phage KP27, <i>Klebsiella</i> phage Miro, <i>Escherichia</i> phage phT4A)                                                                           | gp24 capsid vertex protein                         | pfam07068: Gp23 (Major capsid protein Gp23) family                                    |
| KP-KP15_gp204 | 136605–137024 | 139 | 100 ( <i>Klebsiella</i> phage KP27, <i>Klebsiella</i> phage Matisse, <i>Klebsiella</i> phage Miro, <i>Enterobacter</i> phage $\phi$ Eap-3, <i>Escherichia</i> phage phT4A) | UvsY                                               | pfam11056: UvsY (Recombination, repair and ssDNA binding protein UvsY) family         |

|               |               |     |                                                                                                                                                                            |                                                   |                                                                                         |
|---------------|---------------|-----|----------------------------------------------------------------------------------------------------------------------------------------------------------------------------|---------------------------------------------------|-----------------------------------------------------------------------------------------|
| KP-KP15_gp205 | 137024–137200 | 58  | 100 ( <i>Klebsiella</i> phage KP27, <i>Klebsiella</i> phage Miro, <i>Enterobacter</i> phage $\phi$ Eap-3, <i>Escherichia</i> phage phT4A)                                  | UvsY.-2                                           | pfam10886: DUF2685 (protein of unknown function DUF2685) family                         |
| KP-KP15_gp206 | 137527–137760 | 77  | 100 ( <i>Klebsiella</i> phage KP27, <i>Klebsiella</i> phage Matisse, <i>Klebsiella</i> phage Miro, <i>Enterobacter</i> phage $\phi$ Eap-3)                                 | UvsW.1 hypothetical protein                       | pfam11637: UvsW (ATP-dependant DNA helicase UvsW) family                                |
| KP-KP15_gp207 | 137769–139109 | 446 | 100 ( <i>Klebsiella</i> phage KP27, <i>Klebsiella</i> phage Matisse, <i>Klebsiella</i> phage Miro, <i>Enterobacter</i> phage $\phi$ Eap-3, <i>Escherichia</i> phage phT4A) | UvsW helicase                                     | pfam04851: ResIII (Type III restriction enzyme, res subunit) family                     |
| KP-KP15_gp208 | 139270–139917 | 215 | 100 ( <i>Klebsiella</i> phage KP27)                                                                                                                                        | Inh minor capsid protein inhibitor of 21 protease | –                                                                                       |
| KP-KP15_gp211 | 140959–141492 | 177 | 100 ( <i>Klebsiella</i> phage KP27, <i>Klebsiella</i> phage Miro)                                                                                                          | Hoc head outer capsid protein                     | –                                                                                       |
| KP-KP15_gp212 | 141503–141778 | 91  | 100 ( <i>Klebsiella</i> phage KP27, <i>Klebsiella</i> phage Matisse, <i>Klebsiella</i> phage Miro, <i>Escherichia</i> phage phT4A)                                         | Hoc large outer capsid protein                    | –                                                                                       |
| KP-KP15_gp221 | 145889–146413 | 174 | 99 ( <i>Klebsiella</i> phage KP27, <i>Klebsiella</i> phage Matisse, <i>Klebsiella</i> phage Miro, <i>Enterobacter</i> phage $\phi$ Eap-3, <i>Escherichia</i> phage phT4A)  | Srd postulated decoy of host sigma70 or sigmaS    | –                                                                                       |
| KP-KP15_gp222 | 146417–147436 | 339 | 99 ( <i>Klebsiella</i> phage KP27, <i>Klebsiella</i> phage Matisse)                                                                                                        | RnlB RNA ligase 2                                 | pfam09414: RNA_ligase (RNA ligase) family                                               |
| KP-KP15_gp227 | 149344–150777 | 477 | 100 ( <i>Klebsiella</i> phage KP27, <i>Klebsiella</i> phage Matisse, <i>Enterobacter</i> phage $\phi$ Eap-3, <i>Escherichia</i> phage phT4A)                               | nicotinamide phosphoribosyl transferase           | pfam04095: NAPRTase (Nicotinate phosphoribosyltransferase) family                       |
| KP-KP15_gp229 | 151063–151914 | 283 | 99 ( <i>Escherichia</i> phage phT4A)                                                                                                                                       | Dam DNA adenine methylase                         | pfam02086: MethyltransfD12 (D12 class N6 adenine-specific DNA methyltransferase) family |

|               |               |      |                                                                                                                                                                           |                                                            |                                                                                                                    |
|---------------|---------------|------|---------------------------------------------------------------------------------------------------------------------------------------------------------------------------|------------------------------------------------------------|--------------------------------------------------------------------------------------------------------------------|
| KP-KP15_gp230 | 151923–152198 | 91   | 100 ( <i>Klebsiella</i> phage KP27, <i>Klebsiella</i> phage Matisse, <i>Enterobacter</i> phage $\phi$ Eap-3, <i>Escherichia</i> phage phT4A)                              | NrdC thioredoxin                                           | pfam00462: Glutaredoxin family                                                                                     |
| KP-KP15_gp231 | 152230–152712 | 160  | 100 ( <i>Klebsiella</i> phage KP27, <i>Enterobacter</i> phage $\phi$ Eap-3, <i>Escherichia</i> phage phT4A)                                                               | gp49 recombination endonuclease VII                        | pfam09124: Endonuc-dimeris (T4 recombination endonuclease VII, dimerisation) family                                |
| KP-KP15_gp232 | 152709–154832 | 707  | 99 ( <i>Enterobacter</i> phage $\phi$ Eap-3)                                                                                                                              | NrdD anaerobic ribonucleotide reductase subunit            | pfam03477: ATP-cone (ATP cone domain) family; pfam01228: Gly_radical (Glycine radical) family                      |
| KP-KP15_gp240 | 157386–157877 | 163  | 99 ( <i>Enterobacter</i> phage $\phi$ Eap-3)                                                                                                                              | NrdG anaerobic nucleotide reductase subunit                | pfam13353: Fer4_12 (4Fe-4S single cluster domain) family; pfam13394: Fer4_14 (4Fe-4S single cluster domain) family |
| KP-KP15_gp243 | 159577–159858 | 93   | 99 ( <i>Klebsiella</i> phage KP27, <i>Klebsiella</i> phage Matisse, <i>Klebsiella</i> phage Miro, <i>Enterobacter</i> phage $\phi$ Eap-3, <i>Escherichia</i> phage phT4A) | NrdH                                                       | pfam00462: Glutaredoxin family                                                                                     |
| KP-KP15_gp245 | 160234–164007 | 1257 | 99 ( <i>Klebsiella</i> phage Miro)                                                                                                                                        | gp34 long tail fiber proximal subunit                      | PHA02584: 34 (long tail fiber, proximal subunit)                                                                   |
| KP-KP15_gp246 | 164007–165131 | 374  | 99 ( <i>Klebsiella</i> phage KP27)                                                                                                                                        | gp35 hinge connector of long tail fiber proximal connector | –                                                                                                                  |
| KP-KP15_gp247 | 165181–165849 | 222  | 95 ( <i>Klebsiella</i> phage Matisse)                                                                                                                                     | hinge connector of long tail fiber distal connector        | pfam03903: Phage_T4_gp36 (Phage T4 tail fibre) family                                                              |
| KP-KP15_gp248 | 165858–169844 | 1328 | 80 ( <i>Escherichia</i> phage phT4A)                                                                                                                                      | L-shaped tail fiber protein                                | pfam13884: Peptidase_S74 (Chaperone of endosialidase) family                                                       |
| KP-KP15_gp249 | 169881–170408 | 175  | 99 ( <i>Klebsiella</i> phage Miro)                                                                                                                                        | gp38 distal long tail fiber assembly catalyst              | pfam05268: GP38 (Phage tail fibre adhesin Gp38) family                                                             |
| KP-KP15_gp250 | 170525–171172 | 215  | 100 ( <i>Klebsiella</i> phage Matisse, <i>Klebsiella</i> phage Miro)                                                                                                      | T holin                                                    | pfam11031: Phage_holin_T (Bacteriophage T holin) family                                                            |

|               |               |     |                                                                             |     |   |
|---------------|---------------|-----|-----------------------------------------------------------------------------|-----|---|
| KP-KP15_gp256 | 173605–174042 | 145 | 100 ( <i>Klebsiella</i> phage Miro, <i>Enterobacter</i> phage $\phi$ Eap-3) | Ndd | – |
|---------------|---------------|-----|-----------------------------------------------------------------------------|-----|---|

**Table S1b** Annotation of KP27 genome

| Locus tag  | ORF position | Length of product (aa) | Percent identity with homologous proteins from other phages                                                                                  | Predicted molecular function                     | Characteristic domains                                                                  |
|------------|--------------|------------------------|----------------------------------------------------------------------------------------------------------------------------------------------|--------------------------------------------------|-----------------------------------------------------------------------------------------|
| G376_gp276 | 1–2262       | 753                    | 99 ( <i>Klebsiella</i> phage KP15, <i>Klebsiella</i> phage Miro)                                                                             | rIIA protector from prophage-induced early lysis | pfam13589: HATPase_c_3 (Histidine kinase-, DNA gyrase B-, and HSP90-like ATPase) family |
| G376_gp273 | 3139–4425    | 428                    | 100 ( <i>Klebsiella</i> phage Matisse)                                                                                                       | DNA topoisomerase medium subunit                 | pfam00521: DNA_topoisoIV (DNA gyrase/topoisomerase IV, subunit A) family                |
| G376_gp272 | 4425–6323    | 632                    | 100 ( <i>Klebsiella</i> phage Miro)                                                                                                          | DNA topoisomerase large subunit                  | pfam00204: DNA_gyraseB (DNA gyrase B) family                                            |
| G376_gp257 | 10819–11490  | 223                    | 100 ( <i>Klebsiella</i> phage KP15, <i>Klebsiella</i> phage Matisse, <i>Enterobacter</i> phage $\phi$ Eap-3, <i>Escherichia</i> phage phT4A) | exonuclease A                                    | PHA02570: dexA (exonuclease)                                                            |
| G376_gp254 | 12105–13433  | 442                    | 100 ( <i>Klebsiella</i> phage Matisse, <i>Klebsiella</i> phage Miro, <i>Enterobacter</i> phage $\phi$ Eap-3, <i>Escherichia</i> phage phT4A) | DNA helicase                                     | pfam13604: AAA_30 (AAA domain) family                                                   |
| G376_gp251 | 13902–14438  | 178                    | 100 ( <i>Klebsiella</i> phage KP15, <i>Klebsiella</i> phage Miro, <i>Enterobacter</i> phage $\phi$ Eap-3)                                    | dCTPase                                          | PHA02602: 56 (dCTP pyrophosphatase)                                                     |
| G376_gp250 | 14446–15471  | 341                    | 100 ( <i>Klebsiella</i> phage Matisse, <i>Klebsiella</i> phage Miro, <i>Escherichia</i> phage phT4A)                                         | DNA primase subunit                              | pfam08275: Toprim_N (DNA primase catalytic core, N-terminal domain) family              |

|            |             |     |                                                                                                                                                                            |                                            |                                                                                                                                       |
|------------|-------------|-----|----------------------------------------------------------------------------------------------------------------------------------------------------------------------------|--------------------------------------------|---------------------------------------------------------------------------------------------------------------------------------------|
| G376_gp241 | 18576–20012 | 478 | 100 ( <i>Klebsiella</i> phage Matisse, <i>Klebsiella</i> phage Miro)                                                                                                       | replication and recombination DNA helicase | pfam03796: DnaB_C (DnaB-like helicase C terminal domain) family                                                                       |
| G376_gp240 | 20022–20342 | 106 | 100 ( <i>Klebsiella</i> phage KP15, <i>Klebsiella</i> phage Matisse, <i>Klebsiella</i> phage Miro, <i>Enterobacter</i> phage $\phi$ Eap-3, <i>Escherichia</i> phage phT4A) | head vertex assembly chaperone             | pfam11113: Phage_head_chap (Head assembly gene product) family                                                                        |
| G376_gp239 | 20378–21535 | 385 | 99 ( <i>Klebsiella</i> phage KP15, <i>Klebsiella</i> phage Miro, <i>Escherichia</i> phage phT4A)                                                                           | RecA-like recombination protein            | pfam00154: RecA (recA bacterial DNA recombination protein) family                                                                     |
| G376_gp238 | 21610–24309 | 899 | 99 ( <i>Klebsiella</i> phage Matisse)                                                                                                                                      | DNA polymerase                             | pfam03104: DNA_pol_B_exo1 (DNA polymerase family B, exonuclease domain) family; pfam00136: DNA_pol_B (DNA polymerase family B) family |
| G376_gp235 | 25038–25400 | 120 | 100 ( <i>Klebsiella</i> phage Miro, <i>Enterobacter</i> phage $\phi$ Eap-3, <i>Escherichia</i> phage phT4A)                                                                | RegA                                       | pfam01818: Translat_reg (Bacteriophage translational regulator) family                                                                |
| G376_gp234 | 25404–25967 | 187 | 99 ( <i>Klebsiella</i> phage KP15)                                                                                                                                         | clamp loader small subunit                 | PHA02593: 62 (clamp loader small subunit)                                                                                             |
| G376_gp233 | 25970–26968 | 332 | 100 ( <i>Klebsiella</i> phage KP15, <i>Klebsiella</i> phage Matisse, <i>Klebsiella</i> phage Miro, <i>Enterobacter</i> phage $\phi$ Eap-3, <i>Escherichia</i> phage phT4A) | clamp-loader subunit                       | pfam00004: AAA (ATPase family associated with various cellular activities) family                                                     |
| G376_gp232 | 27027–27692 | 221 | 100 ( <i>Klebsiella</i> phage KP15, <i>Klebsiella</i> phage Matisse, <i>Klebsiella</i> phage Miro, <i>Enterobacter</i> phage $\phi$ Eap-3, <i>Escherichia</i> phage phT4A) | sliding clamp protein                      | pfam02916: DNA_PPF (DNA polymerase processivity factor) family; pfam09116: gp45-slide_C (gp45 sliding clamp, C terminal) family       |
| G376_gp231 | 27719–27988 | 89  | 100 ( <i>Klebsiella</i> phage KP15, <i>Klebsiella</i> phage Matisse, <i>Klebsiella</i> phage Miro, <i>Enterobacter</i> phage $\phi$ Eap-3, <i>Escherichia</i> phage phT4A) | RNA polymerase binding protein             | pfam10789: Phage_RpbA (Phage RNA polymerase binding, RpbA) family                                                                     |
| G376_gp230 | 28044–29015 | 323 | 100 ( <i>Klebsiella</i> phage Matisse)                                                                                                                                     | ssDNA binding protein                      | pfam08804: gp32 (gp32 DNA binding protein like) family                                                                                |

|            |             |     |                                                                                                                                                                            |                                                |                                                                                                                                                       |
|------------|-------------|-----|----------------------------------------------------------------------------------------------------------------------------------------------------------------------------|------------------------------------------------|-------------------------------------------------------------------------------------------------------------------------------------------------------|
| G376_gp229 | 29031–29690 | 219 | 99 ( <i>Klebsiella</i> phage Matisse, <i>Klebsiella</i> phage Miro, <i>Enterobacter</i> phage $\phi$ Eap-3)                                                                | loader of DNA helicase                         | pfam08993: T4_Gp59_N (T4 gene Gp59 loader of gp41 DNA helicase) family; pfam08994: T4_Gp59_C (T4 gene Gp59 loader of gp41 DNA helicase C-term) family |
| G376_gp228 | 29687–29932 | 81  | 100 ( <i>Klebsiella</i> phage KP15, <i>Klebsiella</i> phage Matisse, <i>Klebsiella</i> phage Miro, <i>Enterobacter</i> phage $\phi$ Eap-3, <i>Escherichia</i> phage phT4A) | late promoter transcription accessory protein  | pfam16805: Trans_coact (Phage late-transcription coactivator) family                                                                                  |
| G376_gp227 | 29936–30199 | 87  | 100 ( <i>Klebsiella</i> phage KP15, <i>Klebsiella</i> phage Matisse, <i>Klebsiella</i> phage Miro, <i>Escherichia</i> phage phT4A)                                         | dsDNA binding protein late transcription       | pfam11126: Phage_DsbA (Transcriptional regulator DsbA) family                                                                                         |
| G376_gp226 | 30209–31144 | 311 | 100 ( <i>Klebsiella</i> phage KP15, <i>Klebsiella</i> phage Matisse, <i>Klebsiella</i> phage Miro, <i>Enterobacter</i> phage $\phi$ Eap-3, <i>Escherichia</i> phage phT4A) | RNaseH ribonuclease                            | pfam02739: 5_3_exonuc_N (5'-3' exonuclease, N-terminal resolvase-like domain) family; pfam09293: RNaseH_C (T4 RNase H, C terminal) family             |
| G376_gp225 | 31449–31976 | 175 | 100 ( <i>Klebsiella</i> phage KP15, <i>Klebsiella</i> phage Matisse, <i>Klebsiella</i> phage Miro, <i>Enterobacter</i> phage $\phi$ Eap-3)                                 | sigma factor for late transcription            | PHA02547: 55 (RNA polymerase sigma factor)                                                                                                            |
| G376_gp222 | 32559–33590 | 343 | 99 ( <i>Escherichia</i> phage phT4A)                                                                                                                                       | recombination endonuclease subunit             | PHA02546: 47 (endonuclease subunit)                                                                                                                   |
| G376_gp220 | 33848–35545 | 565 | 100 ( <i>Klebsiella</i> phage Miro)                                                                                                                                        | recombination endonuclease subunit             | pfam13476: AAA_23 (AAA domain) family; pfam13555: AAA_29 (P-loop containing region of AAA domain) family                                              |
| G376_gp214 | 38347–38925 | 192 | 99 ( <i>Klebsiella</i> phage KP15)                                                                                                                                         | dihydrofolate reductase                        | pfam00186: DHFR_1 (Dihydrofolate reductase) family                                                                                                    |
| G376_gp213 | 38927–39802 | 291 | 100 ( <i>Klebsiella</i> phage KP15, <i>Klebsiella</i> phage Matisse, <i>Klebsiella</i> phage Miro)                                                                         | thymidylate synthetase                         | pfam00303: Thymidylat_synt (Thymidylate synthase) family                                                                                              |
| G376_gp212 | 39842–42094 | 750 | 99 ( <i>Klebsiella</i> phage KP15, <i>Klebsiella</i> phage Matisse, <i>Klebsiella</i> phage Miro, <i>Enterobacter</i> phage $\phi$ Eap-3)                                  | aerobic ribonucleotide reductase large subunit | pfam02867: Ribonuc_red_lgC (Ribonucleotide reductase, barrel domain) family                                                                           |
| G376_gp211 | 42131–43306 | 391 | 100 ( <i>Klebsiella</i> phage Matisse, <i>Klebsiella</i> phage Miro)                                                                                                       | aerobic ribonucleotide reductase B subunit     | pfam00268: Ribonuc_red_sm (Ribonucleotide reductase, small chain) family                                                                              |

|            |             |     |                                                                                                                                            |                                                 |                                                                                                |
|------------|-------------|-----|--------------------------------------------------------------------------------------------------------------------------------------------|-------------------------------------------------|------------------------------------------------------------------------------------------------|
| G376_gp209 | 43873–44238 | 121 | 100 ( <i>Klebsiella</i> phage KP15, <i>Klebsiella</i> phage Matisse, <i>Klebsiella</i> phage Miro, <i>Enterobacter</i> phage $\phi$ Eap-3) | endonuclease II                                 | PHA02598: denA (endonuclease II)                                                               |
| G376_gp208 | 44219–45376 | 385 | 100 ( <i>Klebsiella</i> phage Matisse)                                                                                                     | RNA ligase 1 and tail fiber attachment catalyst | pfam09511: RNA_lig_T4_1 (RNA ligase) family                                                    |
| G376_gp204 | 46162–47046 | 294 | 99 ( <i>Klebsiella</i> phage Matisse, <i>Enterobacter</i> phage $\phi$ Eap-3)                                                              | 3' phosphatase, 5' polynucleotide kinase        | pfam13207: AAA_17 (AAA domain) family; pfam13671: AAA_33 (AAA domain) family                   |
| G376_gp200 | 47901–48407 | 168 | 100 ( <i>Enterobacter</i> phage $\phi$ Eap-3)                                                                                              | dCMP deaminase                                  | pfam00383: dCMP_cyt_deam_1 (Cytidine and deoxycytidylate deaminase zinc-binding region) family |
| G376_gp199 | 48423–48764 | 113 | 100 ( <i>Enterobacter</i> phage $\phi$ Eap-3, <i>Escherichia</i> phage phT4A)                                                              | co-chaperonin for GroEL                         | pfam00166: Cpn10 (Chaperonin 10 Kd subunit) family                                             |
| G376_gp183 | 53940–55469 | 509 | 100 ( <i>Klebsiella</i> phage KP15, <i>Enterobacter</i> phage $\phi$ Eap-3, <i>Escherichia</i> phage phT4A)                                | gp30 DNA ligase                                 | PHA00454: PHA00454 (ATP-dependent DNA ligase)                                                  |
| G376_gp177 | 56924–58033 | 369 | 100 ( <i>Escherichia</i> phage phT4A)                                                                                                      | baseplate hub subunit                           | pfam09097: Phage-tail_1 (Baseplate structural protein, domain 1) family                        |
| G376_gp176 | 58103–58678 | 191 | 100 ( <i>Klebsiella</i> phage KP15, <i>Klebsiella</i> phage Matisse, <i>Klebsiella</i> phage Miro, <i>Escherichia</i> phage phT4A)         | baseplate distal hub subunit                    | pfam11110: Phage_hub_GP28 (Baseplate hub distal subunit) family                                |
| G376_gp175 | 58681–60456 | 591 | 100 ( <i>Klebsiella</i> phage Matisse)                                                                                                     | putative base plate hub                         | –                                                                                              |
| G376_gp174 | 60467–61540 | 357 | 100 ( <i>Klebsiella</i> phage KP15)                                                                                                        | baseplate tail tube cap                         | pfam11091: T4_tail_cap (Tail-tube assembly protein) family                                     |
| G376_gp173 | 61550–62413 | 287 | 100 ( <i>Klebsiella</i> phage Miro)                                                                                                        | baseplate-tail tube initiator                   | PHA02605: 54 (baseplate subunit)                                                               |

|            |             |     |                                                                                                                                    |                                      |                                                                       |
|------------|-------------|-----|------------------------------------------------------------------------------------------------------------------------------------|--------------------------------------|-----------------------------------------------------------------------|
| G376_gp172 | 62442–63185 | 247 | 100 ( <i>Klebsiella</i> phage KP15, <i>Klebsiella</i> phage Matisse, <i>Klebsiella</i> phage Miro, <i>Escherichia</i> phage phT4A) | baseplate hub assembly catalyst      | pfam12322: T4_baseplate (T4 bacteriophage base plate protein) family  |
| G376_gp171 | 63182–63736 | 184 | 100 ( <i>Klebsiella</i> phage Miro, <i>Enterobacter</i> phage φEap-3, <i>Escherichia</i> phage phT4A)                              | baseplate hub subunit                | pfam12322: T4_baseplate (T4 bacteriophage base plate protein) family  |
| G376_gp170 | 63737–64129 | 130 | 100 ( <i>Klebsiella</i> phage KP15, <i>Klebsiella</i> phage Matisse, <i>Klebsiella</i> phage Miro, <i>Escherichia</i> phage phT4A) | baseplate wedge subunit              | pfam04965: GPW_gp25 (Gene 25-like lysozyme) family                    |
| G376_gp154 | 71150–72061 | 303 | 99 ( <i>Klebsiella</i> phage Matisse)                                                                                              | cytosine-specific methyltransferase  | pfam00145: DNA_methylase (C-5 cytosine-specific DNA methylase) family |
| G376_gp142 | 78026–78307 | 93  | 99 ( <i>Enterobacter</i> phage φEap-3)                                                                                             | rI lysis inhibition regulator        | PHA02054: PHA02054 (hypothetical protein)                             |
| G376_gp140 | 78823–79431 | 202 | 99 ( <i>Klebsiella</i> phage Matisse)                                                                                              | thymidine kinase                     | pfam00265: TK (Thymidine kinase) family                               |
| G376_gp128 | 83534–84883 | 449 | 99 ( <i>Enterobacter</i> phage φEap-3)                                                                                             | putative PhoH family protein         | pfam02562: PhoH (PhoH-like protein) family                            |
| G376_gp127 | 84892–85416 | 174 | 57 ( <i>Enterobacteria</i> phage RB16)                                                                                             | putative homing endonuclease         | pfam00847: AP2 (AP2 domain) family                                    |
| G376_gp099 | 95748–96155 | 135 | 100 ( <i>Klebsiella</i> phage KP15, <i>Klebsiella</i> phage Matisse, <i>Klebsiella</i> phage Miro)                                 | nudix hydrolase                      | pfam00293: NUDIX (NUDIX domain) family                                |
| G376_gp090 | 98936–99196 | 86  | 100 ( <i>Klebsiella</i> phage Miro)                                                                                                | chaperone for tail fiber formation   | –                                                                     |
| G376_gp089 | 99211–99906 | 231 | 99 ( <i>Klebsiella</i> phage Matisse, <i>Klebsiella</i> phage Miro)                                                                | deoxynucleoside monophosphate kinase | PHA02575: 1 (deoxynucleoside monophosphate kinase)                    |



|            |               |      |                                                                                                                                                                            |                                         |                                                                                                        |
|------------|---------------|------|----------------------------------------------------------------------------------------------------------------------------------------------------------------------------|-----------------------------------------|--------------------------------------------------------------------------------------------------------|
| G376_gp088 | 99906-100436  | 176  | 100 ( <i>Klebsiella</i> phage KP15, <i>Klebsiella</i> phage Matisse, <i>Klebsiella</i> phage Miro, <i>Escherichia</i> phage phT4A)                                         | head-proximal tip of tail tube          | PHA02576: 3 (tail completion and sheath stabilizer protein)                                            |
| G376_gp086 | 101631-102485 | 284  | 100 ( <i>Enterobacter</i> phage $\phi$ Eap-3, <i>Escherichia</i> phage phT4A)                                                                                              | DNA end protector protein               | PHA02577: 2 (DNA end protector protein)                                                                |
| G376_gp085 | 102501-102968 | 155  | 100 ( <i>Klebsiella</i> phage KP15, <i>Klebsiella</i> phage Matisse, <i>Klebsiella</i> phage Miro, <i>Enterobacter</i> phage $\phi$ Eap-3, <i>Escherichia</i> phage phT4A) | head completion protein                 | PHA02552: 4 (head completion protein)                                                                  |
| G376_gp084 | 103019-103573 | 184  | 100 ( <i>Klebsiella</i> phage Matisse, <i>Klebsiella</i> phage Miro, <i>Escherichia</i> phage phT4A)                                                                       | baseplate wedge subunit                 | pfam11246: Phage_gp53 (Base plate wedge protein 53) family                                             |
| G376_gp083 | 103570-105339 | 589  | 100 ( <i>Klebsiella</i> phage Miro)                                                                                                                                        | baseplate hub subunit and tail lysozyme | pfam06714: Gp5_OB (Gp5 N-terminal OB domain) family; pfam00959: Phage_lysozyme (Phage lysozyme) family |
| G376_gp081 | 107442-109367 | 641  | 99 ( <i>Enterobacter</i> phage $\phi$ Eap-3)                                                                                                                               | baseplate wedge subunit                 | PHA02553: 6 (baseplate wedge subunit)                                                                  |
| G376_gp080 | 109448-112534 | 1028 | 99 ( <i>Klebsiella</i> phage Matisse)                                                                                                                                      | baseplate wedge subunit                 | PHA02579: 7 (baseplate wedge subunit)                                                                  |
| G376_gp079 | 112535-113527 | 330  | 99 ( <i>Klebsiella</i> phage Matisse, <i>Klebsiella</i> phage Miro, <i>Enterobacter</i> phage $\phi$ Eap-3, <i>Escherichia</i> phage phT4A)                                | baseplate wedge subunit                 | pfam09215: Phage-Gp8 (Bacteriophage T4, Gp8) family                                                    |
| G376_gp078 | 113537-114400 | 287  | 100 ( <i>Enterobacter</i> phage $\phi$ Eap-3)                                                                                                                              | baseplate wedge tail fiber connector    | pfam07880: T4_gp9_10 (Bacteriophage T4 gp9/10-like protein) family                                     |
| G376_gp077 | 114397-116214 | 605  | 99 ( <i>Escherichia</i> phage phT4A)                                                                                                                                       | baseplate wedge subunit and tail pin    | pfam07880: T4_gp9_10 (Bacteriophage T4 gp9/10-like protein) family                                     |
| G376_gp076 | 116214-116882 | 222  | 99 ( <i>Klebsiella</i> phage KP15, <i>Escherichia</i> phage phT4A)                                                                                                         | baseplate wedge subunit tail pin        | pfam08677: GP11 (GP11 baseplate wedge protein) family                                                  |

|            |               |     |                                                                                                                                                                            |                                               |                                                                                       |
|------------|---------------|-----|----------------------------------------------------------------------------------------------------------------------------------------------------------------------------|-----------------------------------------------|---------------------------------------------------------------------------------------|
| G376_gp075 | 116892–118277 | 461 | 100 ( <i>Klebsiella</i> phage KP15)                                                                                                                                        | short tail fibers                             | pfam07484: Collar (Phage Tail Collar Domain) family                                   |
| G376_gp074 | 118288–120039 | 583 | 99 ( <i>Enterobacter</i> phage $\phi$ Eap-3)                                                                                                                               | fibrin neck whiskers                          | pfam07921: Fibrin_C (Fibrin C-terminal region) family                                 |
| G376_gp073 | 120078–121004 | 308 | 100 ( <i>Klebsiella</i> phage KP15, <i>Klebsiella</i> phage Matisse, <i>Klebsiella</i> phage Miro)                                                                         | head completion                               | PHA02554: 13 (neck protein)                                                           |
| G376_gp072 | 121014–121760 | 248 | 100 ( <i>Klebsiella</i> phage KP15, <i>Klebsiella</i> phage Matisse, <i>Klebsiella</i> phage Miro, <i>Enterobacter</i> phage $\phi$ Eap-3)                                 | head completion                               | pfam11649: T4_neck-protein (Virus neck protein) family                                |
| G376_gp071 | 121840–122664 | 274 | 99 ( <i>Klebsiella</i> phage Matisse)                                                                                                                                      | tail sheath stabilizer and completion protein | PHA02556: 15 (tail sheath stabilizer and completion protein)                          |
| G376_gp070 | 122664–123203 | 179 | 100 ( <i>Klebsiella</i> phage KP15, <i>Klebsiella</i> phage Matisse, <i>Enterobacter</i> phage $\phi$ Eap-3, <i>Escherichia</i> phage phT4A)                               | small terminase protein                       | pfam11053: DNA_Packaging (Terminase DNA packaging enzyme) family                      |
| G376_gp069 | 123172–125001 | 609 | 100 ( <i>Klebsiella</i> phage KP15)                                                                                                                                        | terminase subunit nuclease and ATPase         | pfam03237: Terminase_6 (Terminase-like) family                                        |
| G376_gp068 | 125021–127012 | 663 | 99 ( <i>Klebsiella</i> phage KP15, <i>Klebsiella</i> phage Matisse)                                                                                                        | tail sheath protein                           | pfam04984: Phage_sheath_1 (Phage tail sheath protein) family                          |
| G376_gp067 | 127061–127546 | 161 | 100 ( <i>Klebsiella</i> phage KP15, <i>Klebsiella</i> phage Matisse, <i>Klebsiella</i> phage Miro, <i>Enterobacter</i> phage $\phi$ Eap-3, <i>Escherichia</i> phage phT4A) | tail tube monomer                             | pfam06841: Phage_T4_gp19 (T4-like virus tail tube protein gp19) family                |
| G376_gp066 | 127602–129176 | 524 | 100 ( <i>Klebsiella</i> phage KP15, <i>Klebsiella</i> phage Matisse, <i>Klebsiella</i> phage Miro, <i>Enterobacter</i> phage $\phi$ Eap-3, <i>Escherichia</i> phage phT4A) | portal vertex of the head                     | pfam07230: Phage_T4_Gp20 (Bacteriophage T4-like capsid assembly protein, Gp20) family |
| G376_gp065 | 129176–129418 | 80  | 100 ( <i>Klebsiella</i> phage KP15, <i>Klebsiella</i> phage Miro, <i>Enterobacter</i> phage $\phi$ Eap-3)                                                                  | prohead core protein                          | PHA02608: 67 (prohead core protein)                                                   |

|            |               |     |                                                                                                                                                                            |                                                 |                                                                               |
|------------|---------------|-----|----------------------------------------------------------------------------------------------------------------------------------------------------------------------------|-------------------------------------------------|-------------------------------------------------------------------------------|
| G376_gp064 | 129427–129831 | 134 | 100 ( <i>Klebsiella</i> phage KP15, <i>Klebsiella</i> phage Matisse, <i>Enterobacter</i> phage $\phi$ Eap-3, <i>Escherichia</i> phage phT4A)                               | prohead core protein                            | PHA02586: 68 (prohead core protein)                                           |
| G376_gp063 | 129834–130481 | 215 | 99 ( <i>Klebsiella</i> phage Matisse, <i>Enterobacter</i> phage $\phi$ Eap-3, <i>Escherichia</i> phage phT4A)                                                              | prohead core and protease                       | pfam03420: Peptidase_S77 (Prohead core protein serine protease) family        |
| G376_gp062 | 130514–131302 | 262 | 100 ( <i>Klebsiella</i> phage KP15, <i>Klebsiella</i> phage Matisse, <i>Enterobacter</i> phage $\phi$ Eap-3, <i>Escherichia</i> phage phT4A)                               | prohead core protein                            | PHA02557: 22 (prohead core protein)                                           |
| G376_gp061 | 131322–132890 | 522 | 100 ( <i>Klebsiella</i> phage KP15, <i>Klebsiella</i> phage Matisse)                                                                                                       | major capsid protein                            | pfam07068: Gp23 (Major capsid protein Gp23) family                            |
| G376_gp060 | 132982–133620 | 212 | 99 ( <i>Klebsiella</i> phage Matisse)                                                                                                                                      | homing endonuclease                             | pfam01541: GIY-YIG (GIY-YIG catalytic domain) family                          |
| G376_gp059 | 133653–134942 | 429 | 100 ( <i>Klebsiella</i> phage Miro, <i>Escherichia</i> phage phT4A)                                                                                                        | capsid vertex protein                           | pfam07068: Gp23 (Major capsid protein Gp23) family                            |
| G376_gp058 | 135256–135675 | 139 | 100 ( <i>Klebsiella</i> phage KP15, <i>Klebsiella</i> phage Matisse, <i>Klebsiella</i> phage Miro, <i>Enterobacter</i> phage $\phi$ Eap-3, <i>Escherichia</i> phage phT4A) | recombination, repair and ssDNA binding protein | pfam11056: UvsY (Recombination, repair and ssDNA binding protein UvsY) family |
| G376_gp055 | 136368–137867 | 499 | 100 ( <i>Klebsiella</i> phage Matisse, <i>Klebsiella</i> phage Miro, <i>Enterobacter</i> phage $\phi$ Eap-3, <i>Escherichia</i> phage phT4A)                               | helicase                                        | pfam04851: ResIII (Type III restriction enzyme, res subunit) family           |
| G376_gp054 | 137938–138516 | 192 | 100 ( <i>Klebsiella</i> phage KP15)                                                                                                                                        | minor capsid protein inhibitor of protease      | –                                                                             |
| G376_gp051 | 139558–140091 | 177 | 100 ( <i>Klebsiella</i> phage KP15, <i>Klebsiella</i> phage Miro)                                                                                                          | Hoc head outer capsid protein                   | –                                                                             |
| G376_gp050 | 140102–140377 | 91  | 100 ( <i>Klebsiella</i> phage KP15, <i>Klebsiella</i> phage Matisse, <i>Klebsiella</i> phage Miro, <i>Escherichia</i> phage phT4A)                                         | Hoc large outer capsid protein                  | –                                                                             |

|            |               |     |                                                                                                                                              |                                               |                                                                                                                    |
|------------|---------------|-----|----------------------------------------------------------------------------------------------------------------------------------------------|-----------------------------------------------|--------------------------------------------------------------------------------------------------------------------|
| G376_gp041 | 144488–145012 | 174 | 100 ( <i>Klebsiella</i> phage Matisse, <i>Klebsiella</i> phage Miro, <i>Enterobacter</i> phage $\phi$ Eap-3, <i>Escherichia</i> phage phT4A) | postulated decoy of host sigma70 or sigmaS    | –                                                                                                                  |
| G376_gp040 | 145016–146035 | 339 | 100 ( <i>Klebsiella</i> phage Matisse)                                                                                                       | RNA ligase 2                                  | pfam09414: RNA_ligase (RNA ligase) family                                                                          |
| G376_gp039 | 146039–146557 | 172 | 54 ( <i>Enterobacteria</i> phage RB16)                                                                                                       | putative homing endonuclease                  | pfam13392: HNH_3 (HNH endonuclease) family                                                                         |
| G376_gp034 | 148471–149904 | 477 | 100 ( <i>Klebsiella</i> phage KP15, <i>Klebsiella</i> phage Matisse, <i>Enterobacter</i> phage $\phi$ Eap-3, <i>Escherichia</i> phage phT4A) | putative nicotinate phosphoribosyltransferase | pfam04095: NAPRTase (Nicotinate phosphoribosyltransferase) family                                                  |
| G376_gp032 | 150190–151041 | 283 | 99 ( <i>Escherichia</i> phage phT4A)                                                                                                         | DNA adenine methylase                         | pfam02086: MethyltransfD12 (D12 class N6 adenine-specific DNA methyltransferase) family                            |
| G376_gp031 | 151050–151325 | 91  | 100 ( <i>Klebsiella</i> phage KP15, <i>Klebsiella</i> phage Matisse, <i>Enterobacter</i> phage $\phi$ Eap-3, <i>Escherichia</i> phage phT4A) | thioredoxin                                   | pfam00462: Glutaredoxin family                                                                                     |
| G376_gp030 | 151357–151839 | 160 | 100 ( <i>Klebsiella</i> phage KP15, <i>Enterobacter</i> phage $\phi$ Eap-3, <i>Escherichia</i> phage phT4A)                                  | recombination endonuclease VII                | pfam09124: Endonuc-dimeris (T4 recombination endonuclease VII, dimerisation) family                                |
| G376_gp029 | 151836–153959 | 707 | 99 ( <i>Enterobacter</i> phage $\phi$ Eap-3)                                                                                                 | anaerobic ribonucleotide reductase subunit    | pfam03477: ATP-cone (ATP cone domain) family; pfam01228: Gly_radical (Glycine radical) family                      |
| G376_gp023 | 155517–156158 | 213 | 99 ( <i>Klebsiella</i> phage Matisse, <i>Klebsiella</i> phage Miro)                                                                          | putative homing endonuclease                  | pfam01844: HNH (HNH endonuclease) family                                                                           |
| G376_gp022 | 156155–156646 | 163 | 100 ( <i>Klebsiella</i> phage Miro)                                                                                                          | anaerobic nucleotide reductase subunit        | pfam13353: Fer4_12 (4Fe-4S single cluster domain) family; pfam13394: Fer4_14 (4Fe-4S single cluster domain) family |
| G376_gp019 | 158346–158627 | 93  | 100 ( <i>Klebsiella</i> phage Matisse, <i>Klebsiella</i> phage Miro, <i>Enterobacter</i> phage $\phi$ Eap-3, <i>Escherichia</i> phage phT4A) | glutaredoxin                                  | pfam00462: Glutaredoxin family                                                                                     |

|            |               |      |                                                                                                                                   |                                                       |                                                              |
|------------|---------------|------|-----------------------------------------------------------------------------------------------------------------------------------|-------------------------------------------------------|--------------------------------------------------------------|
| G376_gp017 | 159003–162776 | 1257 | 99 ( <i>Klebsiella</i> phage Matisse)                                                                                             | proximal tail fiber subunit                           | PHA02584: 34 (long tail fiber, proximal subunit)             |
| G376_gp016 | 162776–163900 | 374  | 99 ( <i>Klebsiella</i> phage Matisse)                                                                                             | hinge connector of long tail fiber proximal connector | –                                                            |
| G376_gp015 | 163950–164618 | 222  | 99 ( <i>Klebsiella</i> phage Miro, <i>Enterobacter</i> phage $\phi$ Eap-3)                                                        | hinge connector of long tail fiber distal connector   | pfam03903: Phage_T4_gp36 (Phage T4 tail fibre) family        |
| G376_gp014 | 164627–168700 | 1357 | 86 ( <i>Klebsiella</i> phage Matisse)                                                                                             | L-shaped tail fiber protein                           | pfam13884: Peptidase_S74 (Chaperone of endosialidase) family |
| G376_gp013 | 168740–169267 | 175  | 98 ( <i>Klebsiella</i> phage KP15)                                                                                                | distal long tail fiber assembly catalyst              | pfam05268: GP38 (Phage tail fibre adhesin Gp38) family       |
| G376_gp012 | 169379–170026 | 215  | 99 ( <i>Klebsiella</i> phage KP15, <i>Klebsiella</i> phage Matisse, <i>Klebsiella</i> phage Miro)                                 | T holin lysis mediator                                | pfam11031: Phage_holin_T (Bacteriophage T holin) family      |
| G376_gp003 | 172683–173063 | 126  | 100 ( <i>Escherichia</i> phage phT4A)                                                                                             | nucleoid disruption protein                           | –                                                            |
| G376_gp001 | 173515–174405 | 296  | 99 ( <i>Klebsiella</i> phage KP15, <i>Klebsiella</i> phage Matisse, <i>Klebsiella</i> phage Miro, <i>Escherichia</i> phage phT4A) | rIIB protein                                          | –                                                            |

**Table S2** KP15 phage predicted promoters, terminators and tRNA requences

| <b>Putative host promoters of KP15</b>     |        |                                                 |
|--------------------------------------------|--------|-------------------------------------------------|
| Location                                   |        | Sequence                                        |
| Start                                      | End    |                                                 |
| 10075                                      | 10042  | <b>TTGTTAAAACATTCTGGGGTAGCTTTGGTATAGT</b>       |
| 10425                                      | 10386  | <b>AAAGAAGCCTCTTGCAATGCGGGAGGCTTTTTGGTATCT</b>  |
| 11177                                      | 11136  | <b>AAAACAAGCCCTTGACTTCGGTTGAGGGCTTTTGTATATT</b> |
| 18890                                      | 18863  | <b>TTGACCTGAATCTCCATTGTGGTAATAT</b>             |
| 25663                                      | 25635  | <b>TTGCATTTCGTGCAGGGGCTTTGTTATATT</b>           |
| 55838                                      | 55875  | <b>AAAAAGCCCTTGACTCCGGTCGGGGGCTTTGTTATATT</b>   |
| 56495                                      | 56543  | <b>AAAGAAGCCTCTTGCAATGCAGGGGGCTTTTTGTATATT</b>  |
| 56848                                      | 56876  | <b>TTGTGTTCTGGGTAATGTAATGGTACATT</b>            |
| 75902                                      | 75862  | <b>AAAAAGCCCTTGCGTTCTCGTGAGGGCTTTTGTATTAT</b>   |
| 82955                                      | 82918  | <b>AAAAAGCCCTTGACTTCGGTCGGGGGCTTTTTTATTAT</b>   |
| 88440                                      | 88413  | <b>TTGACACTAATCCCCGTTGTGATAATAT</b>             |
| 91788                                      | 91760  | <b>TTGTGTTTGGTTCTTTATAGGGTTATATT</b>            |
| 92611                                      | 92581  | <b>TTGCTAAAACCTCGATAACCCTGATCTGTTAT</b>         |
| 92975                                      | 92938  | <b>TTGCCTATGGTGAGGGGTTTTGTTATATT</b>            |
| 98843                                      | 98814  | <b>TGTTGACTTTGGTTTATATTATGGTAAGAT</b>           |
|                                            |        |                                                 |
| 148527                                     | 148555 | <b>TTGACGGGGGTTGGTTATAGTAGTATTCT</b>            |
| 54835                                      | 154873 | <b>TTGACTTCGGTTGAGGGCTTTTGTATATT</b>            |
| <b>Rho-independent terminators of KP15</b> |        |                                                 |
| Location                                   |        | Sequence                                        |
| Start                                      | End    |                                                 |
| 7288                                       | 7277   | CCCCGAAAGGGG                                    |
| 9393                                       | 9382   | GGGCTTCGGCCC                                    |
| 10419                                      | 10399  | GCCTCTTGCAATGCGGGAGGC                           |

|        |        |                                |
|--------|--------|--------------------------------|
| 11168  | 11149  | CCCTTGACTTCGGTTGAGGG           |
| 18556  | 18543  | GCCCCGAAAGGGGC                 |
| 18543  | 18556  | GCCCCTTTCGGGGC                 |
| 20991  | 21010  | TATGGGGCCGAAGCCCCATA           |
| 22240  | 22227  | GGGGCTTCGGCCCC                 |
| 25667  | 25646  | GCCCTTGCATTTCGTGCAGGGGC        |
| 27652  | 27639  | GGGGCTACGGCCCC                 |
| 28656  | 28675  | GTGGGGGCCGAAGCCCCCGC           |
| 36400  | 36421  | GCCCATGTAACGAAACGTGGGC         |
| 40445  | 40458  | GGGGCTTCGGCCCC                 |
| 50429  | 50446  | GGCTATCTTCGGATAGCC             |
| 51680  | 51701  | GCCGTTGCCGAAAGGTAGCGGC         |
| 55843  | 55864  | GCCCTTGACTCCGGTCGGGGGC         |
| 63421  | 63434  | GGGGCTACGGCCCC                 |
| 65142  | 65163  | GCCCCTCCTTTCGGTTGGGGC          |
| 65163  | 65142  | GCCCCAACCGAAAGGAAGGGGC         |
| 71395  | 71382  | GCCCCGAAAGGGGC                 |
| 75894  | 75873  | GCCCTTGCATTCTCGTGAGGGC         |
| 75933  | 75962  | CCGCACATAAAAGATCATCTATATGTGCGG |
| 82949  | 82930  | CCCTTGACTTCGGTCGGGGG           |
| 84459  | 84444  | GGGGGCGAAAGCCCCC               |
| 88102  | 88089  | GCCCCGAAAGGGGC                 |
| 92970  | 92950  | CCCCTTGCCTATGGTGAGGGG          |
| 94665  | 94644  | GCCCTTGCATTAGTGCAGGGGC         |
| 99077  | 99056  | GCCCTTGCATTTCGTGCAGGGGC        |
| 100286 | 100273 | GGGGCTACGGCCCC                 |
| 102986 | 102965 | GCCCCAACCGAAAGGAAGGGGC         |
| 102965 | 102986 | GCCCCTCCTTTCGGTTGGGGC          |
| 110738 | 110757 | CCCCTGTCTTCGGATAGGGG           |

|                     |        |                                                                               |
|---------------------|--------|-------------------------------------------------------------------------------|
| 121416              | 121429 | GGGGCTTCGGCCCC                                                                |
| 128928              | 128943 | GGGGTAGCAATACCCC                                                              |
| 134283              | 134300 | GGGAACCTTCGGGTTCCC                                                            |
| 134300              | 134283 | GGGAACCCGAAGGTTCCC                                                            |
| 136335              | 136360 | GGTGGAGTAGGGAACTTACTCCATC                                                     |
| 137521              | 137500 | GCCCCAACCGAAAGGAAGGGGC                                                        |
| 137500              | 137521 | GCCCCCTCCTTTCGGTTGGGGC                                                        |
| 140329              | 140342 | GGGGCTACGGCCCC                                                                |
| 142335              | 142317 | GGGAACCATTGCGGTTCCC                                                           |
| 142317              | 142335 | GGGAACCGCAATGGTTCCC                                                           |
| 147481              | 147460 | CGGCTACCGATCAGGGTAGCCG                                                        |
| 154840              | 154861 | GCCCTTGACTTCGGTTGAGGGC                                                        |
| 158915              | 158930 | GGGTGCTCCGGCACCC                                                              |
| 160171              | 160184 | TGGCCTTCGGGCCA                                                                |
| 165137              | 165154 | GGCCCGGAACATCGGGCC                                                            |
| 165154              | 165137 | GGCCCGATGTTCCGGGCC                                                            |
| 169850              | 169863 | GGGGCTTCGGCCCC                                                                |
| 170454              | 170472 | GGCTACCATATAGGTAGCC                                                           |
| 170472              | 170454 | GGCTACCTATATGGTAGCC                                                           |
| <b>tRNA of KP15</b> |        |                                                                               |
| Location            |        | Sequence                                                                      |
| Start               | End    |                                                                               |
| 49401               | 49477  | GGCCCCTTAGCTCAATAGGTAGAGCTAATCACTCATAATGGTTAGGTTCCCGGTTCAAGTCACGGGAGGGGCCACCA |
| 49483               | 49559  | GGCAAGGCACTTAGAGAAGCGGGAGGAACAGAATCTGATTCTGTTGGTTGTAGGTGCAAATCCTACCCTTGCCACCA |



**Table S3** KP27 phage predicted promoters, terminators and tRNA requences

| <b>Putative host promoters of KP27</b> |       |                                            |
|----------------------------------------|-------|--------------------------------------------|
| Location                               |       | Sequence                                   |
| Start                                  | End   |                                            |
| 3126                                   | 3098  | <b>TTGCAATGCAGGGGGCTTTTTGCTATATT</b>       |
| 8896                                   | 8868  | <b>TTGCATAGAATAACCATCTTTGATATAGT</b>       |
| 9178                                   | 9144  | <b>TTGCTAAAGACTTCACTGGGTAGCTTTGGTATAGT</b> |
| 9778                                   | 9750  | <b>TTGCATTGCGGGAGGCTTTTTGGTATCTT</b>       |
| 10530                                  | 10501 | <b>TTGACTTCGGTTGAGGGCTTTTGTATATT</b>       |
| 13799                                  | 13772 | <b>TTGAAAGAAAACTTTTACTGATTATACT</b>        |
| 15793                                  | 15765 | <b>TTGACAGAAAAATCCTCTTAGTCTATGAT</b>       |
| 25026                                  | 24998 | <b>TTGCATTTCGTGCAGGGGGCTTTGTTATATT</b>     |
| 27762                                  | 27735 | <b>TTGACACAGCAGCGGAAACCGTTGTAAA</b>        |
| 31202                                  | 31175 | <b>TTGACTTCATTCGTAAGTACTACAAT</b>          |
| 31237                                  | 31265 | <b>TTGATCTGATCAAATTTATGATCTATAAT</b>       |
| 31310                                  | 31282 | <b>TTGACCTACAATGATCATTGTAGTAAAAT</b>       |
| 31398                                  | 31425 | <b>TTGATTTTGTCTACAGTTATTATATAAT</b>        |
| 37508                                  | 37535 | <b>TTGACTTATTAATCAAATGAACTATAAT</b>        |
| 47047                                  | 47074 | <b>TTGACATATAATGTGGGTATGTTAAAGT</b>        |
| 51361                                  | 51389 | <b>TTGACTCCCTTCTCACATTCCTTATAGT</b>        |
| 55495                                  | 55523 | <b>TTGCATACGTGCGAGGGCTTTGTTATATT</b>       |
| 55842                                  | 55870 | <b>TTGCTTACTGGGTAGTGTAGTGATACATT</b>       |
| 71157                                  | 71129 | <b>TTGCATAGGCTAACGAAGAATAGTATAGT</b>       |
| 75299                                  | 75271 | <b>TTGCGTTCTCGTGAGGGCTTTTGTATTAT</b>       |
| 76619                                  | 76592 | <b>TTGACATCTAAAACGAGAATACTATAAT</b>        |
| 77624                                  | 77597 | <b>TTGACAGCGTGAAATGTGATGATAGAAT</b>        |
| 78413                                  | 78387 | <b>TTGACTTTATAGCAAAAATATTATAAC</b>         |
| 82015                                  | 81987 | <b>TTGACTTCGGTCGGGGGGCTTTTTTATTAT</b>      |

|        |        |                                            |
|--------|--------|--------------------------------------------|
| 82726  | 82698  | <b>TTGCATAAATATAAAGTGGGGTGTATTAT</b>       |
| 86338  | 86310  | <b>TTGACATCCAGAAAATAAACTAGTAGTAT</b>       |
| 90583  | 90555  | <b>TTGCGTTGTGTGTAGGGTAATGATACCTT</b>       |
| 91242  | 91209  | <b>TTGCTAAAACCTCGATAACCCTGTTCTGTTATATT</b> |
| 91279  | 91252  | <b>TGGAAAATCGCTAAGAAAATGGTATAAT</b>        |
| 91598  | 91570  | <b>TTGCCATTGGCAAGGGGTTTTGTTATATT</b>       |
| 93293  | 93265  | <b>TTGCATTTCGTGCAAGGGCTTTGTTATATT</b>      |
| 97704  | 97676  | <b>TTGCATTTCGTGCAGGGGCTTTGTTATATT</b>      |
| 100516 | 100544 | <b>TTGACCTTTTTAAAATCTTTGATCTATAAT</b>      |
| 100632 | 100660 | <b>TTGAATTCATAAATTTTATGATCTATAAT</b>       |
| 135204 | 135176 | <b>TAGTCAAATTTAAATTGATCTAATATAAT</b>       |
| 135198 | 135225 | <b>TTGACTACTAATTAATATAGTATATTAT</b>        |
| 138530 | 138558 | <b>TTGACCTTACCCTGCTGTTTCGAGTATATT</b>      |
| 141458 | 141432 | <b>TTGACATTAATGATTAACATTATAGT</b>          |
| 142327 | 142356 | <b>TTGACATGCTTTCTGACAGTGGTGTATGGT</b>      |
| 153971 | 154000 | <b>TTGACTTCGGTTGAGGGCTTTTGTATATT</b>       |
| 171449 | 171420 | <b>TTGACTTCGGTCAGGGGCTTTTGCTATATT</b>      |
| 173098 | 173071 | <b>TTGACATTCACAAATATGCAATTAAAAT</b>        |

**Rho-independent terminators of KP27**

| Location |       | Sequence              |
|----------|-------|-----------------------|
| Start    | End   |                       |
| 3131     | 3111  | GCCTCTTGCAATGCAGGGGGC |
| 6389     | 6378  | CCCCGAAAGGGG          |
| 8494     | 8483  | GGGCTTCGGCCC          |
| 9509     | 9529  | TCACGGTGTGCGCCACCGTGA |
| 9783     | 9763  | GCCTCTTGCAATGCGGGAGGC |
| 10533    | 10514 | CCCTTGACTTCGGTTGAGGG  |
| 17907    | 17920 | GCCCCGAAAGGGGC        |
| 17920    | 17907 | GCCCCTTCGGGGC         |

|       |       |                                 |
|-------|-------|---------------------------------|
| 20356 | 20375 | TATGGGGCCGAAGCCCCATA            |
| 21603 | 21590 | GGGGCTTCGGCCCC                  |
| 25030 | 25009 | GCCCTTGCATTTCGTGCAGGGGC         |
| 27015 | 27002 | GGGGCTACGGCCCC                  |
| 28019 | 28038 | GTGGGGGCCGAAGCCCCCGC            |
| 32533 | 32516 | TAGCCCCTTTCGGGGGCTA             |
| 35763 | 35784 | GCCCATGTAACGAAACGTGGGC          |
| 37536 | 37557 | GGGAACTGTTAACGCAGTTCCC          |
| 37557 | 37536 | GGGAACTGCGTTAACAGTTCCC          |
| 42100 | 42113 | GCCCCTTCGGGGGC                  |
| 50062 | 50079 | GGCTATCTTCGGATAGCC              |
| 50079 | 50062 | GGCTATCCGAAGATAGCC              |
| 51313 | 51334 | GCCGTTGCCGAAAGGTAGCGGC          |
| 55491 | 55512 | GCCCTTGCATACGTGCGAGGGC          |
| 62415 | 62428 | GGGGCTACGGCCCC                  |
| 62428 | 62415 | GGGGCCGTAGCCCC                  |
| 64136 | 64157 | GCCCCTTCCTTTCGGTTGGGGC          |
| 64157 | 64136 | GCCCAACCGAAAGGAAGGGGC           |
| 70804 | 70791 | GCCCCTTTTGGGGC                  |
| 75303 | 75282 | GCCCTTGCGTTCTCGTGAGGGC          |
| 75342 | 75371 | CCGCACATAAAAGATCATCTATATGTGCGG  |
| 78388 | 78372 | CGAGGCTTCGGCCTCG                |
| 82019 | 81989 | GCCCTTGACTTCGGTCGGGGGCTTTTTTATT |
| 83529 | 83514 | GGGGGCGAAAGCCCCC                |
| 85854 | 85831 | TACCCTGTGTACCCAAACAGGGTA        |
| 86690 | 86677 | GCCCCGAAAGGGGC                  |
| 91602 | 91582 | CCCCTTGCCATTGGCAAGGGG           |
| 91582 | 91602 | CCCCTTGCCAATGGCAAGGGG           |
| 93297 | 93276 | GCCCTTGCATTTCGTGCAAGGGC         |

|                     |        |                                                                               |
|---------------------|--------|-------------------------------------------------------------------------------|
| 93276               | 93297  | GCCCTTGCACGAATGCAAGGGC                                                        |
| 97708               | 97687  | GCCCTTGCATTCGTGCAGGGGC                                                        |
| 98917               | 98895  | GGGGCTTCGGCCCCTTTTTTATT                                                       |
| 101602              | 101623 | GCCCCTTCCTTCCGGTTGGGGC                                                        |
| 101623              | 101602 | GCCCAACCGGAAGGAAGGGGC                                                         |
| 109375              | 109394 | CCCCTGTCTTCGGATAGGGG                                                          |
| 120050              | 120063 | GGGGCTTCGGCCCC                                                                |
| 127561              | 127576 | GGGGTAGCAATACCCC                                                              |
| 132922              | 132939 | GGGAACCTTCGGGTTCCC                                                            |
| 134974              | 134999 | GGTGGAGTAGGGAACTTACTCCATC                                                     |
| 136119              | 136098 | GCCCAACCGAAAGGAAGGGGC                                                         |
| 136098              | 136119 | GCCCCTTCCTTTCGGTTGGGGC                                                        |
| 138928              | 138941 | GGGGCTACGGCCCC                                                                |
| 140916              | 140934 | GGGAACCGCAATGGTTCCC                                                           |
| 140934              | 140916 | GGGAACCATTGCGGTTCCC                                                           |
| 153967              | 153988 | GCCCTTGACTTCGGTTGAGGGC                                                        |
| 157684              | 157707 | GGGTGCTCCGGCACCCCTTTTTTAT                                                     |
| 158940              | 158953 | TGCCTTCGGGCCA                                                                 |
| 162939              | 162922 | GGCGGTGTCCCTACCGCC                                                            |
| 169308              | 169326 | GGTACCATATAGGTAGCC                                                            |
| 169326              | 169308 | GGTACCTATATGGTAGCC                                                            |
| 171453              | 171432 | GCCCTTGACTTCGGTCAGGGGC                                                        |
| <b>tRNA of KP27</b> |        |                                                                               |
| Location            |        | Sequence                                                                      |
| Start               | End    |                                                                               |
| 49034               | 49110  | GGCCCCTTAGCTCAATAGGTAGAGCTAATCACTCATAATGGTTAGGTTCCCGGTTCAAGTCACGGGAGGGGCCACCA |
| 49116               | 49192  | GGCAAGGCACTTAGAGAAGCGGGAGGAACAGAATCTGATTCTGTTGGTTGTAGGTGCAAATCCTACCCTTGCCACCA |

**Table S4** Analysis of possible genes involved in DNA modification according to Iyer et al. 2013.

| Modification type                                              | GI:           | Gene size (bp) | Protein size (aa) | Enzymes                                                                           | Bases modified                                                | Origin                                                |                                   | Identity to YP_007348875 | Identity to YP_007348891 | Protein of homologue found in KP27 genome |
|----------------------------------------------------------------|---------------|----------------|-------------------|-----------------------------------------------------------------------------------|---------------------------------------------------------------|-------------------------------------------------------|-----------------------------------|--------------------------|--------------------------|-------------------------------------------|
|                                                                |               |                |                   |                                                                                   |                                                               | Phage                                                 | Host                              |                          |                          |                                           |
| Replacement of thymine by uracil                               | 215788        | 720            | 239               | Uracil-DNA glycosylase inhibitor (UGI)                                            | Uracil                                                        | <i>Bacillus</i> phage PBS2                            | <i>Bacillus subtilis</i>          | 2%                       | 1%                       | no                                        |
| Methylation of adenine, cytosine, guanine or uracil            | 5354346       | 780            | 259               | DNA adenine-N6 methyltransferase (Dam)                                            | N6-methyladenine (6mA)                                        | <i>Enterobacteria</i> phage T4                        | <i>Enterobacteriaceae</i>         | 0%                       | 0%                       | yes                                       |
|                                                                | 1620188       | 1035           | 344               | DNA cytosine-C5 methyltransferase (Dcm)                                           | 5-methylcytosine (5mC)                                        | <i>Paramecium bursaria</i> Chlorella virus 1 (PBCV-1) | <i>Paramecium bursaria</i>        | 0%                       | 0%                       | yes                                       |
|                                                                | 6169790<br>2  | 10             | 2                 |                                                                                   |                                                               | <i>Clostridium</i> phage phiCD119                     | <i>Clostridium difficile</i>      | 2%                       | 0%                       | no                                        |
|                                                                | 4723418<br>38 | 702            | 233               | Uracil-5-methyltransferase                                                        | 5-methyluracil (5mU)                                          | <i>Cyanophage</i> MED4-117                            | -                                 | 4%                       | 0%                       | no                                        |
| Modification involving thymidylate (dTMP) synthase (TS) family | 2936667<br>5  | 741            | 246               | 5-hydroxymethylcytosine synthase, deoxycytidylate (dCMP) hydroxymethyltransferase | 5-hydroxymethyl-dCMP (5hm-dCMP)                               | <i>Enterobacteria</i> phage T4                        | <i>Enterobacteriaceae</i>         | 0%                       | 0%                       | no                                        |
|                                                                | 2098712<br>85 | 1152           | 383               | 5-hydroxymethyluracil synthase, deoxyuridylate (dUMP) hydroxymethyltransferase    | 5-hydroxymethyl-dUMP (5hm-dUMP)                               | <i>Bacillus</i> phage SPO1                            | <i>Bacillus subtilis</i>          | 0%                       | 1%                       | no                                        |
| DNA modifications associated with TET/JBP proteins             | 3995285<br>05 | 867            | 288               | TET/JBP proteins (dioxygenases, hydroxylases)                                     | 5-hydroxymethylcytosine (5hmC), 5-hydroxymethyluracil (5hmU)  | <i>Persicivirga</i> phage P12024L                     | <i>Persicivirga</i> sp. IMCC12024 | 4%                       | 0%                       | no                                        |
|                                                                | 3549975<br>82 | 879            | 292               | TET/JBP-associated glycosyltransferases (GTs) (TAGTs)                             | Glycosyl-5-hydroxymethylcytosine (5ghmC)                      | <i>Mycobacterium</i> phage Acadian                    | <i>Mycobacterium smegmatis</i>    | 0%                       | 0%                       | no                                        |
|                                                                | 3995285<br>08 | 351            | 116               |                                                                                   | Glycosyl-5-hydroxymethyluracil (5ghmU, base J)                | <i>Persicivirga</i> phage P12024L                     | <i>Persicivirga</i> sp. IMCC12024 | 2%                       | 0%                       | no                                        |
|                                                                | 3549975<br>84 | 588            | 195               | Amino sugar deacetylases                                                          | Deacetylated amino sugar derivatives                          | <i>Mycobacterium</i> phage Acadian                    | <i>Mycobacterium smegmatis</i>    | 0%                       | 1%                       | no                                        |
|                                                                | 1433182<br>41 | 681            | 226               | Class-II glutamine amidotransferase protein (GAT-II) of the NTN-hydrolase fold    | Adenine, guanine or cytosine with a new carbon-nitrogen group | Marine metagenome                                     | <i>Marine metagenome</i>          | 0%                       | 0%                       | no                                        |

|                                                                          |           |      |     |                                                                                                                                                                                                                 |                                                                 |                                     |                                    |    |    |    |
|--------------------------------------------------------------------------|-----------|------|-----|-----------------------------------------------------------------------------------------------------------------------------------------------------------------------------------------------------------------|-----------------------------------------------------------------|-------------------------------------|------------------------------------|----|----|----|
| Momylation at the N6 position of adenine                                 | 143318244 | 636  | 211 | GCN5-like acetyltransferase (GNAT) superfamily                                                                                                                                                                  | N6-(1-acetamido)-adenine, N6-carbamoylmethyladenine (6ncmA)     | Marine metagenome                   | <i>Marine metagenome</i>           | 0% | 0% | no |
| Deazapurine-like DNA base modifications                                  | 354997289 | 432  | 143 | 6-pyruvoyl tetrahydropterin synthase                                                                                                                                                                            | hypermodified deazapurines, e.g. 7-cyano-7-deazaguanine (PreQ0) | <i>Mycobacterium</i> phage Ares     | <i>Mycobacterium tuberculosis</i>  | 0% | 0% | no |
|                                                                          | 314912621 | 762  | 253 | GTP cyclohydrolase-I (GCHI)                                                                                                                                                                                     | hypermodified deazapurines, e.g. 7-aminomethyl-7-carbaguanine   | <i>Streptococcus</i> phage Dp-1     | <i>Streptococcus pneumoniae</i>    | 0% | 0% | no |
|                                                                          | 29566194  | 792  | 263 | GTP cyclohydrolase-I (GCHI), QueC-like PP-loop ATPase, QueD-like 6-pyruvoyl-tetrahydropterin synthase, QueE-like radical S-adenosyl methionine (SAM) superfamily protein, guanine transglycosylase family (TGT) | hypermodified deazapurines, e.g. 7-cyano-7-deazaguanine (PreQ0) | <i>Mycobacterium</i> phage Rosebush | <i>Mycobacterium smegmatis</i>     | 0% | 0% | no |
| Biosynthesis of $\alpha$ -glutamylthymine or $\alpha$ -putrescinythymine | 418489628 | 1914 | 637 | 5hmU/T synthase, protein with P-loop kinase domain and $\alpha$ -glutamyl/putrescinythymine phosphorylase (aG/PT-pyrophosphorylase) domain 1, protein with Nucleotide-modification associated domain 1 (Nmad1)  | $\alpha$ -glutamylthymine ( $\alpha$ -gluT, agT)                | <i>Bacillus</i> phage SP10          | <i>Bacillus subtilis</i>           | 0% | 2% | no |
| DNA base modification with PP-loop domain                                | 194303201 | 570  | 189 | IbrA-like pyrophosphate-binding (PP)-loop ATPase                                                                                                                                                                | Pyrimidines comparable with lysidine                            | <i>Mycobacterium</i> phage Phaedrus | <i>Mycobacterium smegmatis</i>     | 0% | 0% | no |
|                                                                          | 296389461 | 576  | 191 | IbrA-like pyrophosphate-binding (PP)-loop ATPase, GCN5-like acetyltransferase (GNAT) superfamily                                                                                                                |                                                                 | <i>Pseudomonas</i> phage PAb1       | <i>Pseudomonas aeruginosa PAb1</i> | 0% | 0% | no |
| DNA base modification involving ABC ATPase domain                        | 399528443 | 1140 | 379 | Protein with a N-terminal ABC superfamily ATPase domain and a C-terminal GNAT superfamily domain                                                                                                                | Not known                                                       | <i>Persicivirga</i> phage P12024S   | <i>Persicivirga</i> sp. IMCC12024  | 2% | 0% | no |

|                                                                              |               |      |     |                                                                                                                                                                                                                                                                                          |                                                 |                                          |                                            |    |    |    |
|------------------------------------------------------------------------------|---------------|------|-----|------------------------------------------------------------------------------------------------------------------------------------------------------------------------------------------------------------------------------------------------------------------------------------------|-------------------------------------------------|------------------------------------------|--------------------------------------------|----|----|----|
|                                                                              | 4104915<br>37 | 639  | 212 | ABC ATPase, GCN5-like acetyltransferase (GNAT)                                                                                                                                                                                                                                           | Not known                                       | <i>Salmonella</i> phage SSU5             | <i>Salmonella</i> spp.                     | 0% | 0% | no |
|                                                                              | 1342888<br>13 | 1131 | 376 | Protein with an N-terminal ABC superfamily ATPase domain and a C-terminal GNAT superfamily domain, formyltransferase                                                                                                                                                                     | Not known                                       | <i>Burkholderia</i> phage $\phi$ E255    | <i>Burkholderia thailandensis</i> E255     | 0% | 0% | no |
| Use of S-adenosylmethionine (SAM) derivatives in synthesis of modified bases | 2621137<br>32 | 1329 | 442 | S-adenosylmethionine (SAM) synthetase, DNA adenine-N6 methyltransferase (Dam), DNA cytosine-C5 methyltransferase (Dcm), protein with Nucleotide-modification associated domain 4 (Nmad4)                                                                                                 | SAM derivatives, e.g. S-adenosyl ethionine      | <i>Streptococcus</i> phage $\phi$ -m46.1 | <i>Streptococcus pyogenes</i>              | 5% | 1% | no |
|                                                                              | 3995286<br>99 | 1359 | 452 | S-adenosylmethionine (SAM) decarboxylase, DNA adenine-N6 methyltransferase (Dam)                                                                                                                                                                                                         | SAM derivatives, e.g. S-adenosyl methioninamine | <i>Croceibacter</i> phage P2559S         | <i>Croceibacter atlanticus</i> HTCC2559(T) | 2% | 0% | no |
| DNA base modification involving PBMD1 domain                                 | 2655345<br>0  | 1095 | 364 | Protein with Predicted base modifying domain 1 (PBMD1)                                                                                                                                                                                                                                   | Not known                                       | <i>Streptococcus</i> phage MM1           | <i>Streptococcus pneumoniae</i>            | 2% | 0% | no |
| DNA base modification involving aG/PT-pyrophosphorylase biosynthesis         | 1494082<br>84 | 972  | 323 | 5hmU/T synthase, pyridoxal 5'-Phosphate Dependent (PLPDE) superfamily enzyme, protein with radical-SAM domain, $\alpha$ -glutamyl/putrescinylyl thymine phosphorylase (aG/PT-pyrophosphorylase) 1 and 2, P-loop kinase, protein with Nucleotide-modification associated domain 5 (Nmad5) | Not known                                       | <i>Pseudomonas</i> phage M6              | <i>Pseudomonas aeruginosa</i>              | 0% | 0% | no |
|                                                                              | 3397556<br>73 | 975  | 324 | TET/JBP protein, $\alpha$ -glutamyl/putrescinylyl thymine phosphorylase (aG/PT-pyrophosphorylase) 2, P-loop kinase                                                                                                                                                                       | Not known                                       | <i>Mycobacterium</i> phage Zemanar       | <i>Mycobacterium smegmatis</i>             | 0% | 0% | no |
|                                                                              | 1894270<br>11 | 1047 | 348 | 5hmU/T synthase, $\alpha$ -glutamyl/putrescinylyl thymine phosphorylase (aG/PT-pyrophosphorylase) 1, glycosyltransferases (GT), sulfotransferase (SulfoT), protein with Nucleotide-modification associated domain 1 (Nmad1)                                                              | Not known                                       | <i>Ralstonia</i> phage RSL1              | <i>Ralstonia solanacearum</i>              | 0% | 0% | no |

|                                             |               |      |     |                                                                                                                                              |           |                                   |                       |    |    |    |
|---------------------------------------------|---------------|------|-----|----------------------------------------------------------------------------------------------------------------------------------------------|-----------|-----------------------------------|-----------------------|----|----|----|
|                                             | 4407892<br>79 | 1215 | 404 | P-loop kinase, $\alpha$ -glutamyl/putresciny l thymine phosphorylase (aG/PT-pyrophosphorylase) 2                                             | Not known | <i>Serratia</i> phage $\phi$ MAM1 | <i>Serratia</i> sp.   | 0% | 0% | no |
| DNA base modification involving MazG domain | 4482600<br>61 | 867  | 288 | $\alpha$ -glutamyl/putresciny l thymine phosphorylase (aG/PT-pyrophosphorylase), protein with MazG domain (MazG superfamily pyrophosphatase) | Not known | <i>Dickeya</i> phage Limestone    | <i>Dickeya solani</i> | 0% | 0% | no |



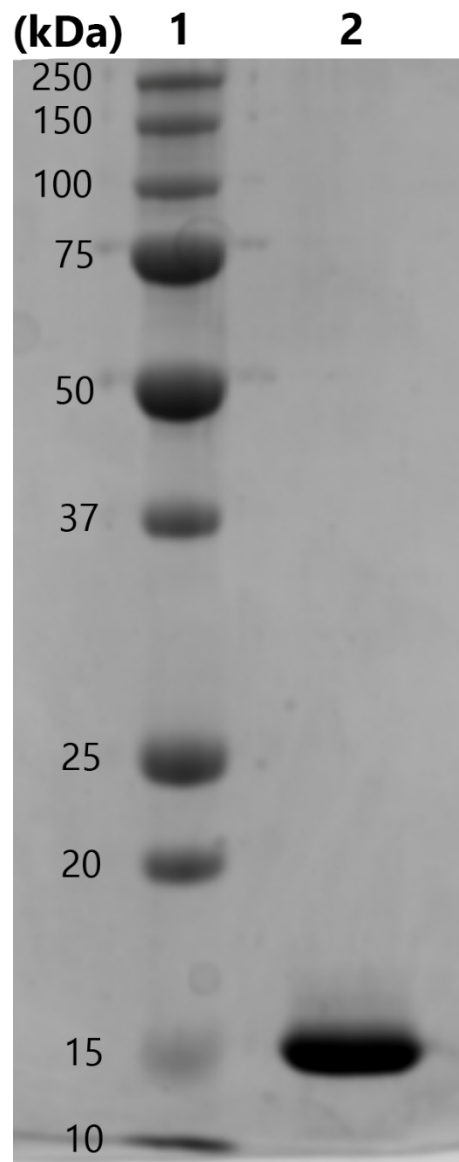

**Fig. S1** SDS-PAGE of purified recombinant KP27 endolysin. Mass marker (lane 1); purified KP27 endolysin (lane 2).

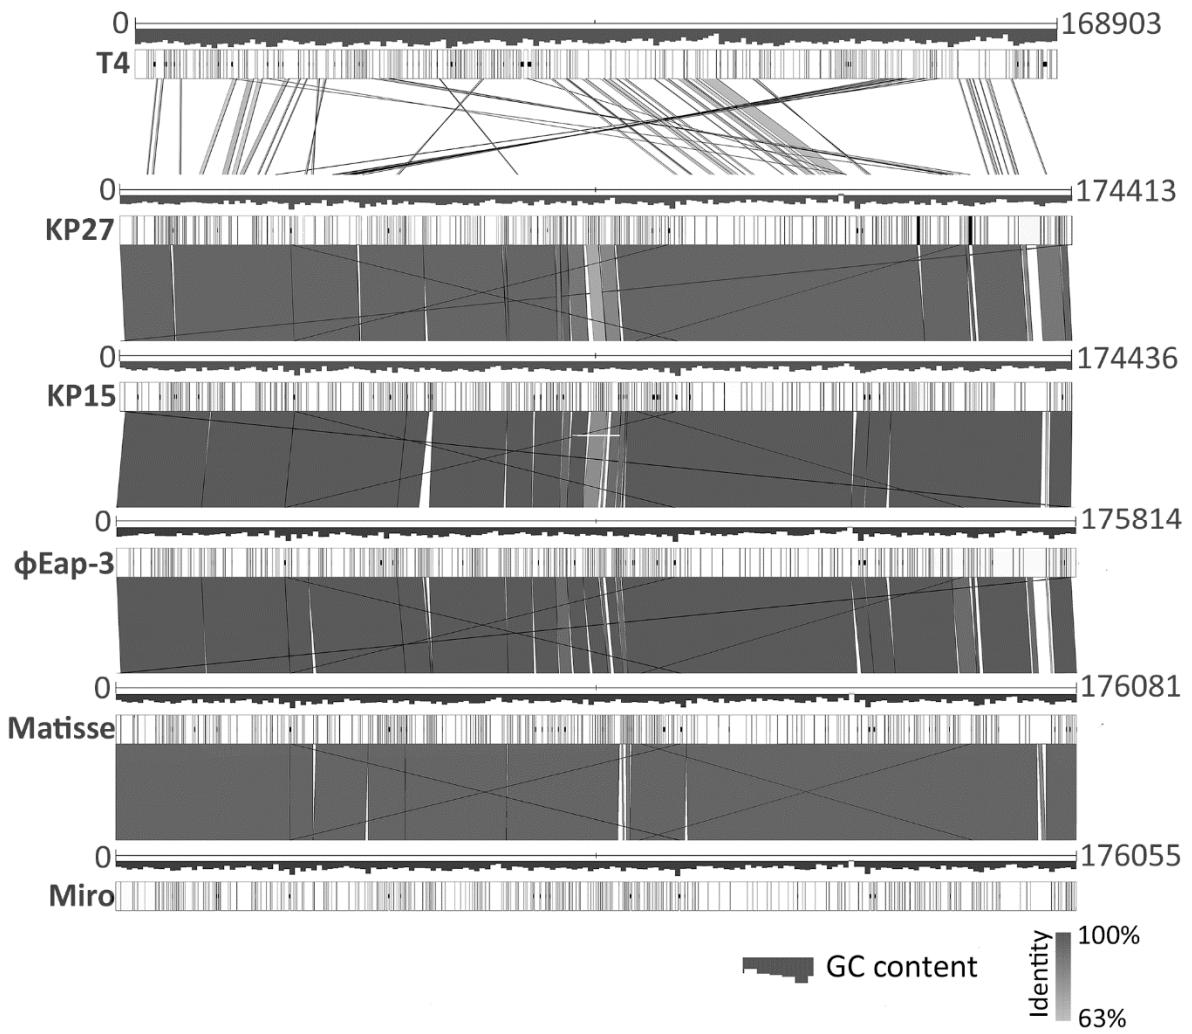

**Fig. S2** The genome comparison of “Kp15 virus” representatives.

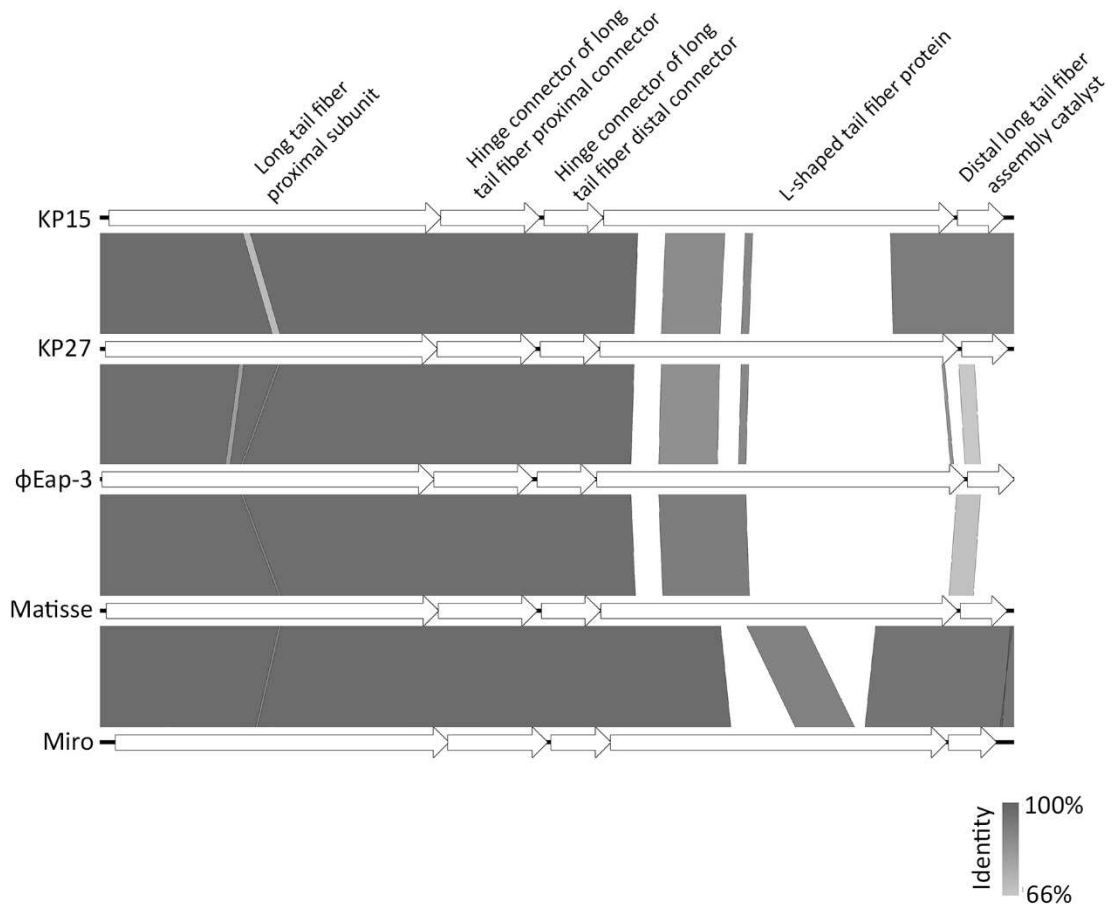

**Fig. S3** The similarity of the tail fibers among the “Kp15virus” representatives.

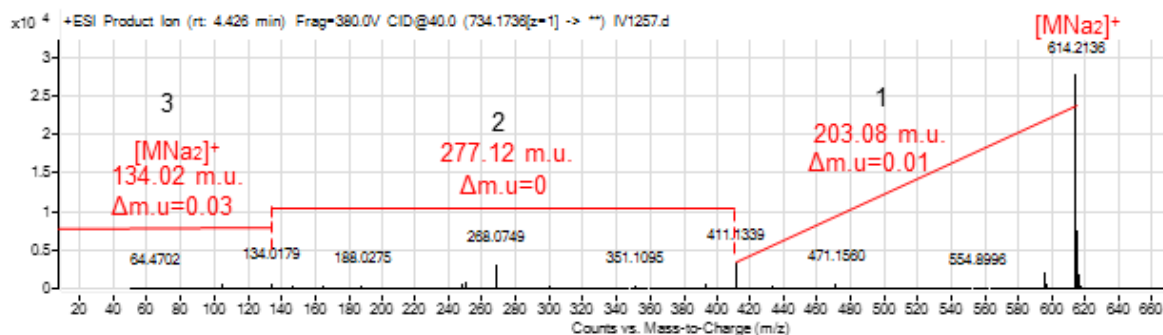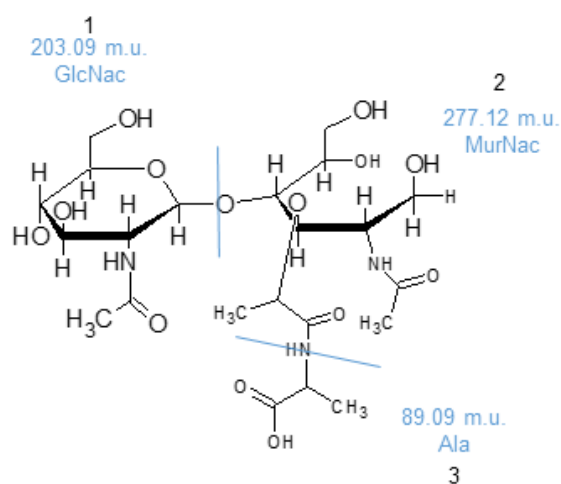

**Fig. S4** MS/MS analysis of peak \*. It is shown the fragmentation pattern (and the theoretical mass) and a scheme of the structure for the muropeptide.  $\Delta m.u.$ : difference between the experimental (red) and the theoretical mass (blue) value for each fragment.
